# Supplementary material
Source: PubMed Central journal article supplement (PMC6003476)
Supplement: pnas.1721110115.sapp.pdf [file pnas.1721110115.sapp.pdf]

## Supporting Information

### Supplemental Materials and Methods

**Plant material.** Seeds of *Arabidopsis thaliana* were sown on 0.8 % agar-water in clear plastic boxes (8 x 5 x 2 cm), stratified 5-7 d at 5 °C in darkness and transferred to simulated sunlight (photoperiod 8 h) at 20 °C for 2 d, before the light or shade treatments. The mutants are listed in Table S3. *Glycine max* (soybean) cv. BIOSOJA 4.70 (Bioceres) was sown on moist cotton and transplanted after germination to 330-cm<sup>3</sup> pots containing perlite, vermiculite and sphagnum peat moss (1: 1: 2) watered with 2% Hakaphos R (COMPO).

**Generation of transgenic line.** The *pPIF4:PIF4-GFP* construct, was generated by amplifying a genomic fragment corresponding to the 2.47 kb promoter region upstream of the ATG and the *PIF4* coding region lacking the stop codon, using the forward primer CACCCAGTACGCATCCAATCTTCTC and the reverse primer TCCGTGGTCCAAACGAGAACCGTC. This PCR product was cloned into the pENTR<sup>TM</sup>/D-TOPO vector and sequenced for the absence of mutations, to be then mobilized into the pGWB4 cassette in the pPZP221 vector, by LR clonase (Invitrogene) recombination. Transgenic lines bearing this construct were obtained by floral dip infiltration of *pif4-101* mutants and selection in gentamycin containing media. Seedlings displaying nuclear fluorescence by the PIF4-GFP protein were then brought to homozygosis.

**Shade intensity.** Simulated shade treatments started at the beginning of the photoperiod of the indicated day. In the glasshouse (soybean experiments), photoperiod was 10.5 h and the presence of neighbors was simulated by a means of a 30-cm tall and 10-cm diameter green plastic tube (Lee filters, 089) placed around each soybean plant. A clear filter (Lee Filters, 130) was used as the sunlight controls. Under controlled conditions, simulated sunlight (red / far-red ratio = 1.14, photosynthetically active radiation= 95  $\mu\text{mol.m}^{-2}.\text{s}^{-1}$ ) was provided by a combination of fluorescent (Osram L30W/10) and halogen (Philips NR63 40W) lamps in addition to a clear and a diffusing filter (Lee Filters, 130 and

216). To produce two levels of simulated shade (red / far-red ratios= 0.45 and 0.19, photosynthetically active radiation= 37 and 26  $\mu\text{mol}\cdot\text{m}^{-2}\cdot\text{s}^{-1}$ , respectively) the clear filter was replaced by a green filter (Lee filters, 089) with or without perforations to allow the penetration of unfiltered light. The light fields were characterized with a spectroradiometer (Ocean Optics, USB4000) (Fig. S9). To obtain a biologically-meaningful integral measure of the shade intensity, we first calculated the terms corresponding to the activity of phyB and the activity of the other photo-receptors from the denominator of the growth equation used by Legris et al. (1) by using each light condition as input. Then we calculated the inverse of these values because there is an inverse relationship between shade and photoreceptor activity. The resulting values were 0.18 for simulated sunlight, 0.25 for weak shade and 0.27 for strong shade. Since simulated shade is conceptually no shade, we subtracted 0.18 to have the final values of shade intensity: 0 for simulated sunlight, 0.07 for weak shade and 0.09 for intense shade.

**Gene expression in soybean.** Samples were harvested on liquid nitrogen between 3 and 4 h after the beginning of the photoperiod. Total RNA was extracted with Trizol Reagent (Invitrogen) following the manufacturer's protocols. To estimate the concentration and quality of samples we used a NanoDrop 2000c (Thermo Scientific) and the Agilent 2100 Bioanalyzer (Agilent Technologies) with the Agilent RNA 6000 NanoKit, respectively. The preparation of the libraries and the paired-end sequencing with an Illumina HiSeq 1500 were performed at INDEAR, Argentina. Three replicates for each treatment and tissue were sequenced.

Sequence reads were mapped to the *Glycine max* Ensembl Gm01 genome using TopHat 2.1.1 (2) with default parameters, except maximum intron length, which was set at 5,000. Count tables for different feature levels were obtained from BAM files, using custom R scripts, and the Ensembl Gm01 transcriptome. Before differential expression analysis, we discarded genes with fewer than 10 reads per condition. Paired comparisons were performed separately for each tissue using the control condition never exposed to shade as reference (i.e., six contrasts). Differential gene expression was analyzed using the edgeR package version 3.18.1 (3), and the resulting P values were adjusted using a false discovery rate (FDR) criterion (4). Genes with FDR values lower than 0.05 were considered as differentially expressed.

The analysis of the full list of genes obtained from the above samples and additional experimental conditions will be presented separately. Given the focus of the current work, the analysis here is restricted to auxin-related genes. A list of 516 *Glycine max* auxin-related genes was built-up by merging annotation data from the Pantherdb, Phytozome and the Soybase data bases (5–7). Differential expression values for each gene in all six paired comparisons were extracted using custom R scripts, then a hierarchical clustering analysis was performed using the hclust R package (8). Clusters were plotted in a heatmap using the pheatmap R package (9).

**Gene expression in *Arabidopsis*.** Samples were harvested in liquid nitrogen 3 h after the beginning of day 4. Total RNA was extracted with the Spectrum Plant Total RNA Kit (Sigma-Aldrich) and subjected to a DNase treatment with RQ1 RNase-Free DNase (Promega). cDNA derived from this RNA was synthesized using Invitrogen SuperScript III and an oligo-dT primer. The synthesized cDNAs were amplified with FastStart Universal SYBRGreen Master (Roche) using the 7500 Real Time PCR System (Applied Biosystems, available from Invitrogen). The *UBIQUITIN-CONJUGATING ENZYME 2 (UBC2)* gene was used as the normalization control (10). The primers used for amplification are listed in Table S4.

**Meta-analysis of gene expression in *Arabidopsis*.** We obtained gene expression data for *IAA19* (AT3G15540), *IAA29* (AT4G32280), and *IAA17/AXR3* (AT1G04250) in *Arabidopsis* seedlings either exposed to light signals simulating neighbors (natural shade, simulated shade or low red / far-red ratios) (11–14) or to auxin treatments (15–20) from publicly available data. Expression data were normalized to the control of each experiment, averaged for the different experiments and analyzed by ANOVA to compare the response of different *Aux/IAAs*.

**Measurement of growth rates.** We photographed the plants with a digital camera and measured internode, petioles or hypocotyl lengths using an image processing software (21). Growth was measured between 9:00 and 13:00 local time for soybean and between 0 and 3 h after the beginning of the photoperiod of day 4 (except when stated otherwise) for *Arabidopsis*.

**Growth models.** To investigate whether growth patterns can be accounted for by the dynamics of selected receptor / signaling components we fitted the data to models of this structure:

$$G = \frac{G_0}{(\beta_0 + \beta_1 x_1)} + \beta_2 x_2 + \dots + \beta_n x_n + \epsilon$$

Where G is the rate of hypocotyl growth,  $G_0$  is the maximum rate, and the denominator includes the explanatory variables, which represent the components that either repress ( $\beta > 0$ ) or promote ( $\beta < 0$ ) growth. For model selection we considered two levels that were analyzed separately for specific purposes: PIFs and auxin perception/ signaling.

We observed three different patterns of PIF4 dynamics, which depended on the tissues examined. Therefore, for the PIF level, we wanted to evaluate which one of these patterns showed the best correlation with growth and we independently parameterized three versions of the model. The first version assumes that PIF activity is elevated by the early exposure to shade and remains elevated if shade is persistent (the pattern observed for PIF4 in epidermal and sub-epidermal hypocotyl tissues). The second version assumes that PIF activity is elevated by early shade and further elevated by persistent shade (the pattern observed for PIF4 in the vascular tissues of the hypocotyl). The third version assumes that PIF activity is elevated by early shade and then decreases under persistent shade (the pattern observed for PIF4 in the cotyledons). The four continuous explanatory variables were PIF3, PIF4, PIF5 and PIF7. These variables were respectively set to zero in the *pif3*, *pif4*, *pif5* and *pif7* mutants. As a proxy for PIF activity in the presence of wild-type alleles we used the values reported in Fig. 3 for PIF4 in the epidermal and sub-epidermal hypocotyl tissues (version 1), in the vascular tissues of the hypocotyl (version 2) and in the cotyledons (version 3). The version of the model that better captured the variability was defined by comparing the modulus of the difference between observed and predicted averages for each genotype and condition (relative to the ones predicted) by means of one-way-ANOVA followed by Bonferroni post tests. We also provide the Chi square values for each model variant. The second variant was the one showing the best goodness of fit. In this case, the four explanatory variables were significant (PIF3:  $P < 0.005$ , PIF4:  $P < 0.0001$ ), PIF5:  $P < 0.0001$  and PIF7:  $P < 0.0001$ ) and their four coefficients were negative, indicating growth promotion by PIFs. As indicated above, we gave PIF3, PIF5 and PIF7 the same values of activity used for PIF4. Although we do not claim that each one of them

followed the same temporal patterns of activity as PIF4, this approach was followed to capture the observed genetic redundancy (stronger effect of multiple mutations than expected from the additive effect of single mutations), particularly when the plants were exposed to shade during day 3. The latter suggests that PIF4 was not the only growth-promoting factor of this level of analysis that enhanced its activity under persistent shade.

For the auxin level we wanted to evaluate the impact on growth of the dynamics of perception /signaling components observed under persistent shade. For this purpose, we independently parameterized two versions of the model, one in which the continuous predictors assumed the values generated by CS conditions at PS=0 (i.e., only CS were taken into account), and the other where the predictors assumed the values generated by the different CS and PS conditions (Fig. S10). The version of the model that better captured the variability was defined by comparing the modulus of the difference between observed and predicted averages for each genotype and condition (relative to the ones predicted) by means of a *t* test. We also provide the Chi square values for each model variant. When the goodness of fit of the model based on PS and CS conditions outperformed the model that only incorporated the effect of CS, we concluded that the growth changes caused by PS in the levels of the receptor / signaling component were significant. The nine explanatory variables were IAA19 (P <0.0001), IAA29 (P <0.0001), AXR3 (P <0.0001), *axr3* x PS x CS (P <0.0001), AXR2 (P <0.0001), MIR393A (P= 0.0857), MIR393B (P= 0.0030), TIR1 plus AFB2 (P <0.0001) and ARF6 (P <0.0001). IAA19, IAA29, AXR2, and TIR1 plus AFB2, had negative coefficients, indicating that they promote growth. AXR3, *axr3* x PS x CS, MIR393A, MIR393B and ARF6 had positive coefficients, indicating that they inhibit growth. As proxies for IAA19 and IAA29 activity, TIR1 plus AFB2 activity and ARF6 activity we used *IAA19* and *IAA29* expression data (Fig. 4A), GUS staining driven by the *pTIR1:TIR1-GUS* and *pTIR1:AFB2-GUS* transgenes (Fig. 4B) and nuclear fluorescence driven by the *pARF6:ARF6-GFP* transgene (Fig. 4F). In the model variant based only on CS conditions we used the respective values observed for plants grown under simulated sunlight on day 3, irrespectively of the actual growth conditions on that day. For these variables the values were set to zero in the loss-of-function mutants and multiplied by two in the gain-of-function mutants. The variables AXR3, AXR2, MIR393A and MIR393B were used as categorical predictors to account for the effect of mutations and the values were set to one for the wild-type alleles, zero for the loss-of function mutant alleles and two for the gain of function alleles. The *axr3* x PS x CS

interaction term reflects the stronger inhibitory effect observed in the *axr3* mutant when the wild-type plants had a higher growth rate due to more intense CS and PS. It was calculated as the product of CS by PS intensity for the *axr3* mutant and set to zero for the rest of the genotypes.

**Confocal microscopy.** Confocal fluorescence images were taken with an LSM5 Pascal (Zeiss) or LSM510 Meta (Zeiss) laser scanning microscope with a Plan-Apochromat 40x/1.2 objective lens. For chloroplast visualization, probes were excited with a He-Ne laser ( $\lambda = 543$  nm) and fluorescence was detected using an LP560 filter. For visualization of GFP/YFP fusion proteins and DII-VENUS, probes were excited with an Argon laser ( $\lambda = 488$  nm) and fluorescence was detected using a BP 505-530 and BP 505-570 filter respectively. To visualize PIF4 in the vascular tissue we used a LSM710 (Zeiss). Objective: 20x W, Laser 488nm.

**Indole-acetic-acid abundance.** Samples were harvested in liquid nitrogen 3 h after the beginning of day 4. Indole-3-acetic acid was quantified by the stable isotope dilution method on an Agilent 7890A/5975C XL GC-MS operated in selected ion monitoring mode, equipped with a 0.25 mm  $\times$  30 m DB-5MS column (0.25  $\mu$ m film) using pulsed splitless injection as described (22).

**Protein blot.** Total protein was extracted in extraction buffer (50 mM Tris/HCl pH 7.5, 100 mM EDTA, 1 mM 1,4-dithiothreitol, 0.1% Triton X-100 and Protease Inhibitor Cocktail, Roche) and quantified using the Bio-Rad Protein Assay (Bio-Rad).  $\beta$ -mercaptoethanol was added immediately before loading aliquots containing equal amounts of protein in polyacrylamide gels for electrophoresis. Immunodetection of PIF4-HA and TIR-myc was performed by using anti-HA (12CA5 Roche, Madison, USA) and anti-myc (Sigma, USA), respectively. Anti-mouse-HRP was used as secondary antibody (Invitrogen) and the Amersham ECL Prime Western Blotting Detection Reagent kit (GE Healthcare, Little Chalfont, UK) was used for detection. Ponceau staining was used to visually check equal loading.

**GUS staining.** Seedlings were fixed in 90% (v/v) acetone at -20 °C for 1 h, washed twice in 50 mM sodium phosphate buffer pH 7.0 and incubated in staining buffer [50 mM Na phosphate (pH 7.0), 5 mM EDTA, 0.1% (v/v) Triton X-100, 5 mM K<sub>4</sub>Fe(CN)<sub>6</sub>, 0.5 mM

K3Fe (CN)<sub>6</sub> and 1 mg/ml X-Gluc (GBT)] at 37 °C from 2 h to overnight. Bright-field images were taken using a Zeiss Axioplan imaging 2 microscope with an Axiocam HRC CCD camera (Zeiss) using the Axiovision program (version 4.2).

**Fluorometric GUS activity assay.** To measure GUS activity in seedling extracts, 50 mg of transgenic seedlings (100-150 seedlings) were frozen in liquid Nitrogen and protein was then extracted in MUG extraction buffer (50 mM Na phosphate buffer, pH 7.4, 0.1% SDS, 0.1% Triton X-100, 10 mM β-mercaptoethanol, and 10 mM EDTA). Protein concentration was determined by Bradford assay. Fifty micrograms of protein extract were incubated in 150 μl of MUG assay buffer (1mM MUG (Duchefa) in GUS extraction buffer from 1 h to 12 h at 37°C. The enzyme reaction was stopped in 0.3M NaCO<sub>3</sub>. Fluorescence was measured using a Fluoroskan Acsent microwell fluorometer (Thermo Electron Company, Vantaa, Finland) and calculated as nanomolar MU per minute per microgram of protein.

**Dexamethasone induction.** Seeds were sown as described above but on a filter paper placed on top of the 0.8 % agar-water in the plastic boxes and the seedlings were grown under the simulated sunlight conditions described above. On day 3, Col-0 and *pDEX:TIR1-myc* seedlings were transferred to plastic boxes containing 0.8% agar-water supplemented with 100 μM Dexamethasone (Dex) and protein level and growth rate were analyzed on day 4.

**Agroinfiltration and transient activation assays.** The *pIAA17:LUC* reporter construct was generated by amplifying a genomic fragment corresponding to a 2.4 kb promoter region upstream of the ATG of *IAA17* and cloning the PCR product into the pDONR207 vector by incubation with BP clonase (Invitrogen), which was subsequently mobilized into the pGWB435 destination vector (23) by LR clonase II reaction (Invitrogen). In order to obtain the IAA19 and PIF4 effector constructs, the IAA19 and PIF4 ORFs without stop codon were amplified and cloned into pENTR TM /D-TOPO vector and subsequently mobilized by LR clonase II reaction into the pABinGFP vector (24) to generate the β-estradiol inducible IAA19-GFP and PIF4-GFP fusions, respectively. Primers used for these constructions are included in Table S5. The empty pABinGFP vector, IAA19 and PIF4 effector constructs were transformed into the *Agrobacterium tumefaciens* GV3101 strain and used to co-infiltrate *Nicotiana benthamiana* leaves together with an *Agrobacterium* strain bearing the *pIAA17:LUC+* reporter and the p19 protein, used as a suppressor of

gene silencing (25). *Agrobacterium* strains containing the pIAA17:LUC+ fusion were diluted in 10 mM MES pH 5.5, 10 mM MgSO<sub>4</sub> and 150 μM acetosyringone at an OD<sub>600</sub> ratio of 0.2, while those containing the p19 protein, the empty pABinGFP vector, or the IAA19-GFP or PIF4-GFP effector constructs were diluted to an OD<sub>600</sub> of 0.4. After incubation for 3 h at room temperature, equal volumes of the reporter, empty vector/ effector vector, and p19 cells were pooled and used for infiltration of *N. benthamiana* leaves. Leaves were sprayed with 20 μM β-estradiol 24 h post infiltration. For *in vivo* imaging of LUC activity, leaves were sprayed with 20 μM β-estradiol 24 h post infiltration and the following day were observed in a luminescence chamber in the presence of 0.02 mg/mL D-luciferin (Promega) in MS media. For time course LUC activity studies, leaf disks were taken two days after infiltration and incubated in the presence of 0.02 mg/mL D-luciferin (Promega) in MS salt media (mock) or MS salt media supplemented with 10 μM β-estradiol. LUC activity was measured every hour by using a LB-960 microplate luminometer (Berthold Technologies), using Mikrowin 2000 (version 4.29) software.

1. Legris M, et al. (2016) Phytochrome B integrates light and temperature signals in Arabidopsis. *Science* 354:897–900.
2. D. Kim, et al. (2013) TopHat2: accurate alignment of transcriptomes in the presence of insertions, deletions and gene fusions. *Genome Biol* 14:R36–R36.
3. M. D. Robinson, McCarthy DJ, Smyth GK (2010) edgeR: a Bioconductor package for differential expression analysis of digital gene expression data. *Bioinformatics* 26:139–140.
4. Benjamini Y, Hochberg Y (1995) Controlling the false discovery rate: A practical and powerful approach to multiple testing. *J R Stat Soc Ser B* 57:289–300.
5. Thomas PD, et al. (2003) PANTHER: A library of protein families and subfamilies indexed by function. *Genome Res* 13:2129–2141.
6. Goodstein DM, et al. (2012) Phytozome: a comparative platform for green plant genomics. *Nucleic Acids Res* 40:D1178–D1186.
7. Grant D, Nelson RT, Cannon SB, Shoemaker RC (2010) SoyBase, the USDA-ARS soybean genetics and genomics database. *Nucleic Acids Res* 38:D843–D846.
8. Team RC (2017) R: A language and environment for statistical computing. Available at: <https://cran.r-project.org/web/packages/pheatmap://www.gbif.org/resource/81287>.



9. Kolde R (2015) pheatmap: Pretty Heatmaps.
10. Czechowski T, Stitt M, Altmann T, Udvardi MK, Scheible W-R (2005) Genome-wide identification and testing of superior reference genes for transcript normalization in *Arabidopsis*. *Plant Physiol* 139:5–17.
11. Sellaro R, Yanovsky MJ, Casal JJ (2011) Repression of shade-avoidance reactions by sunfleck induction of HY5 expression in *Arabidopsis*. *Plant J* 68:919–928.
12. Leivar P, et al. (2012) Dynamic antagonism between phytochromes and PIF family basic helix-loop-helix factors induces selective reciprocal responses to light and shade in a rapidly responsive transcriptional network in *Arabidopsis*. *Plant Cell* 24:1398–419.
13. Kohnen M V, et al. (2016) Neighbor detection induces organ-specific transcriptomes, revealing patterns underlying hypocotyl-specific growth. *Plant Cell* 28:2889–2904.
14. Pacín M, Semmoloni M, Legris M, Finlayson SA, Casal JJ (2016) Convergence of CONSTITUTIVE PHOTOMORPHOGENESIS 1 and PHYTOCHROME INTERACTING FACTOR signalling during shade avoidance. *New Phytol* 211:967–979.
15. Armstrong JI, Yuan S, Dale JM, Tanner VN, Theologis A (2004) Identification of inhibitors of auxin transcriptional activation by means of chemical genetics in *Arabidopsis*. *Proc Natl Acad Sci U S A* 101:14978–83.
16. Chapman EJ, et al. (2012) Hypocotyl transcriptome reveals auxin regulation of growth-promoting genes through GA-dependent and -independent pathways. *PLoS One* 7:e36210.
17. Goda H, et al. (2004) Comprehensive comparison of auxin-regulated and brassinosteroid-regulated genes in *Arabidopsis*. *Plant Physiol* 134:1555–1573.
18. Redman JC, Haas BJ, Tanimoto G, Town CD (2004) Development and evaluation of an *Arabidopsis* whole genome Affymetrix probe array. *Plant J* 38:545–561.
19. Sawa S, et al. (2002) The *HAT2* gene, a member of the HD-Zip gene family, isolated as an auxin inducible gene by DNA microarray screening, affects auxin response in *Arabidopsis*. *Plant J* 32:1011–1022.
20. Zhao Y, Dai X, Blackwell HE, Schreiber SL, Chory J (2003) SIR1, an Upstream Component in Auxin Signaling Identified by Chemical Genetics. *Science* 301: 1107-1110
21. Sellaro R, Hoecker U, Yanovsky M, Chory J, Casal JJ (2009) Synergism of red and

- blue light in the control of Arabidopsis gene expression and development. *Curr Biol* 19:1216–1220.
22. Cagnola JI, Ploschuk E, Benech-Arnold T, Finlayson SA, Casal JJ (2012) Stem transcriptome reveals mechanisms to reduce the energetic cost of shade-avoidance responses in tomato. *Plant Physiol* 160:1110–1119.
  23. Nakagawa T, et al. (2007) Improved Gateway binary vectors: high-performance vectors for creation of fusion constructs in transgenic analysis of plants. *Biosci Biotechnol Biochem* 71:2095–2100.
  24. Bleckmann A, Weidtkamp-Peters S, Seidel C, Simon R (2010) Stem cell signaling in Arabidopsis requires CRN to localize CLV2 to the plasma membrane. *Plant Physiol* 152:166–176.
  25. Voinnet O, Rivas S, Mestre P, Baulcombe D (2003) An enhanced transient expression system in plants based on suppression of gene silencing by the p19 protein of tomato bushy stunt virus. *Plant J* 33:949–956.
  26. Iglesias MJ, Sellaro R, Zurbriggen MD, Casal JJ (2018) Multiple links between shade avoidance and auxin networks. *J Exp Bot* 69: 213-228.
  27. Yamaguchi R, Nakamura M, Mochizuki N, Kay SA, Nagatani A (1999) Light-dependent translocation of a phytochrome B-GFP fusion protein to the nucleus in transgenic Arabidopsis. *J Cell Biol* 145:437–445.
  28. Reed JW, Nagpal P, Poole DS, Furuya M, Chory J (1993) Mutations in the gene for the red / far-red light receptor phytochrome B alter cell elongation and physiological responses throughout Arabidopsis development. *Plant Cell* 5:147–157.
  29. Monte E, et al. (2004) The phytochrome-interacting transcription factor, PIF3, acts early, selectively, and positively in light-induced chloroplast development. *Proceedings Natl Acad Sci USA* 101:16091–16098.
  30. Lorrain S, Allen T, Duek PD, Whitelam GC, Fankhauser C (2008) Phytochrome-mediated inhibition of shade avoidance involves degradation of growth-promoting bHLH transcription factors. *Plant J* 53:312–323.
  31. Fujimori T, Yamashino T, Kato T, Mizuno T (2004) Circadian-controlled basic/helix-loop-helix factor, PIL6, implicated in light-signal transduction in Arabidopsis thaliana. *Plant Cell Physiol* 45:1078–1086.
  32. Leivar P, et al. (2008) Multiple phytochrome-interacting bHLH transcription factors repress premature seedling photomorphogenesis in darkness. *Curr Biol* 18:1815–1823.

33. Leivar P, et al. (2008) The Arabidopsis phytochrome-interacting factor PIF7, together with PIF3 and PIF4, regulates responses to prolonged red light by modulating phyB levels. *Plant Cell* 20:337–352.
34. Tao Y, et al. (2008) Rapid synthesis of auxin via a new tryptophan-dependent pathway is required for shade avoidance in plants. *Cell* 133:164–176.
35. Sun J, Qi L, Li Y, Zhai Q, Li C (2013) PIF4 and PIF5 transcription factors link blue light and auxin to regulate the phototropic response in Arabidopsis. *Plant Cell* 25:2102–2114.
36. Sato A, Yamamoto KT (2008) Overexpression of the non-canonical Aux/IAA genes causes auxin-related aberrant phenotypes in Arabidopsis. *Physiol Plant* 133:397–405.
37. Tatematsu K, et al. (2004) MASSUGU2 encodes Aux/IAA19, an auxin-regulated protein that functions together with the transcriptional activator NPH4/ARF7 to regulate differential growth responses of hypocotyl and formation of lateral roots in Arabidopsis thaliana. *Plant Cell* 16:379–393.
38. Timpte C, Wilson AK, Estelle M (1994) The axr2-1 mutation of Arabidopsis thaliana is a gain-of-function mutation that disrupts an early step in auxin response. *Genetics* 138:1239–49.
39. Fukaki H, Tameda S, Masuda H, Tasaka M (2002) Lateral root formation is blocked by a gain-of-function mutation in the SOLITARY-ROOT/IAA14 gene of Arabidopsis. *Plant J* 29:153–168.
40. Rouse D, Mackay P, Stirnberg P, Estelle M, Leyser O (1998) Changes in auxin response from mutations in an AUX/IAA gene. *Science* 279:1371–1373.
41. Windels D, et al. (2014) miR393 Is Required for Production of Proper Auxin Signalling Outputs. *PLoS One* 9:e95972.
42. Si-Ammour A, et al. (2011) miR393 and secondary siRNAs regulate expression of the TIR1/AFB2 auxin receptor clade and auxin-related development of Arabidopsis leaves. *Plant Physiol* 157:683–691.
43. Savaldi-Goldstein S, Baiga T, Pojer F (2008) New auxin analogs with growth-promoting effects in intact plants reveal a chemical strategy to improve hormone delivery. *Proc Natl Acad Sci USA* 39:15190–15195.
44. Nagpal P, et al. (2005) Auxin response factors ARF6 and ARF8 promote jasmonic acid production and flower maturation. *Development* 132:4107–4118.
45. Okushima Y, et al. (2005) Functional genomic analysis of the AUXIN RESPONSE

- FACTOR gene family members in *Arabidopsis thaliana*: Unique and overlapping functions of ARF7 and ARF19. *Plant Cell Online* 17:444–463.
46. Bernardo-García S, et al. (2014) BR-dependent phosphorylation modulates PIF4 transcriptional activity and shapes diurnal hypocotyl growth. *Genes Dev* 28:1681–94.
  47. Galvão VC, Collani S, Horrer D, Schmid M (2015) Gibberellic acid signaling is required for ambient temperature-mediated induction of flowering in *Arabidopsis thaliana*. *Plant J* 84:949–962.
  48. Parry G, et al. (2009) Complex regulation of the TIR1/AFB family of auxin receptors. *Proc Natl Acad Sci U S A* 106:22540–5.
  49. Gray WM, Kepinski S, Rouse D, Leyser O, Estelle M (2001) Auxin regulates SCF TIR1 -dependent degradation of AUX / IAA proteins. *Nature* 2:271–276.
  50. Brunoud G, et al. (2012) A novel sensor to map auxin response and distribution at high spatio-temporal resolution. *Nature* 482:103–106.
  51. Rademacher EH, et al. (2011) A cellular expression map of the *Arabidopsis* AUXIN RESPONSE FACTOR gene family. *Plant J* 68:597–606.
  52. Herrero E, et al. (2012) EARLY FLOWERING4 recruitment of EARLY FLOWERING3 in the nucleus sustains the *Arabidopsis* circadian clock. *Plant Cell* 24:428–43.
  53. Yang J, et al. (2005) Light regulates COP1-mediated degradation of HFR1, a transcription factor essential for light signaling in *Arabidopsis*. *Plant Cell* 17:804–821.

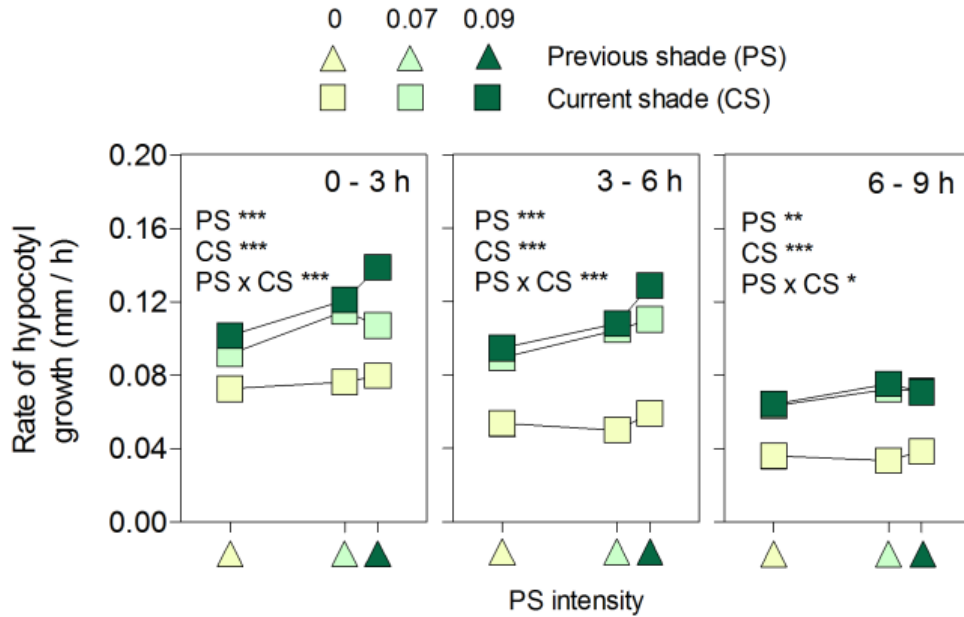

**Fig. S1.** Effect of current shade (CS) and previous shade (PS) conditions on the rate of growth at different times of the day. Hypocotyl growth rate of Arabidopsis seedlings during day 4 (0-3, 3-6 and 3-9 h after the beginning of the photoperiod) as affected by current (day 4) and previous (day 3, abscissas) simulated sunlight or shade conditions. A numerical estimate of shade intensity is provided above the plot. Means  $\pm$ SE of 220 seedlings (smaller than the symbols). \*, P < 0.05; \*\*, P < 0.01; \*\*\*, P < 0.001.

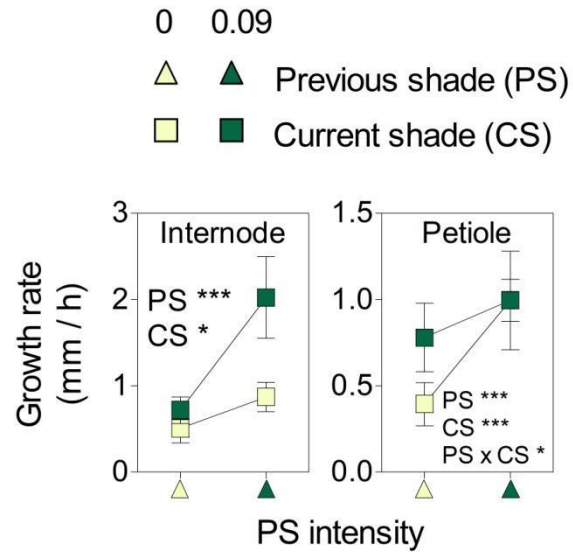

**Fig. S2.** Persistent shade reinforces shade avoidance in soybean. Glasshouse cultivated soybean plants with the first trifoliolate leaf expanded were transferred to simulated shade (low red / far-red, low irradiance) or left as controls. The following day, half of the plants of each group were transferred to the opposite condition, to obtain plants subjected to all possible combinations of current shade (CS) and previous shade (PS). A numerical estimate of shade intensity is provided above the plot. The growth rate of the stem (internode between the unifoliolate and first trifoliolate leaf) and petioles (first trifoliolate leaf) was then measured. In both organs growth promotion was strongly reinforced when plants had been subjected to simulated shade during the previous day (note significant effects of PS or PS x CS interaction). Means  $\pm$ SE of 21 plants. \*,  $P < 0.05$ ; \*\*\*,  $P < 0.001$ .

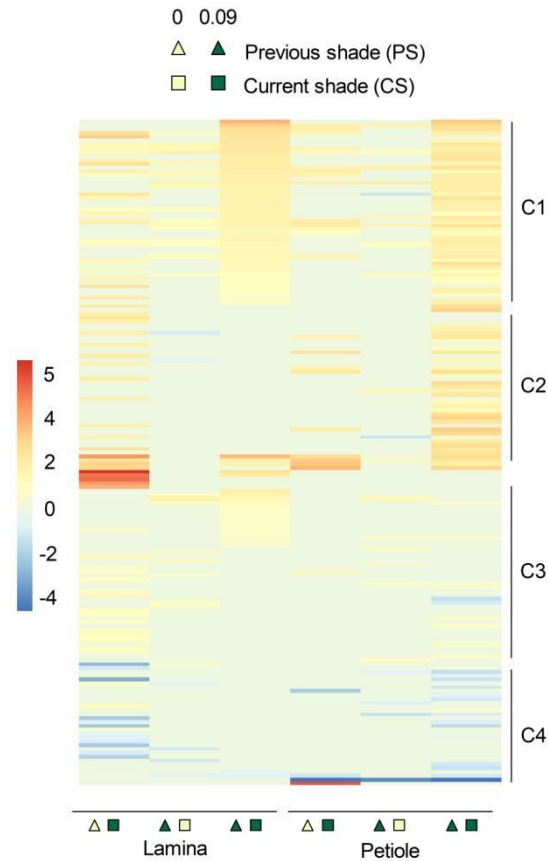

**Fig. S3.** Persistent shade reinforces auxin-related gene expression in soybean. Glasshouse cultivated soybean plants were exposed to all possible combinations of current shade (CS) and previous shade (PS) as described in Fig. S2. A numerical estimate of shade intensity is provided above the plot. The petiole and lamina of the first soybean trifoliate leaf were harvested for RNAseq (3 biological replicates) and differential expression analyses focused on auxin-related genes (Table S1), as these genes typically respond to neighbor signals (26). Four large clusters of genes with statistically significant responses to CS and/or PS were identified. The log<sub>2</sub> fold change compared to the sunlight control (CS= 0, PS= 0) is indicated by the color scale. The control was used for fold-change calculations is therefore not included in the clustering analysis. Clusters 1 and 2 include genes whose expression was increased in the petiole, particularly when exposed to persistent shade (for cluster 1 this was also the case in the lamina). Genes with similarity to *Arabidopsis Aux/IAAs* were found to be over-represented in cluster 1 (42 %, Chi-square test:  $P < 0.00001$ ), including four genes with homology to *MASSUGU 2 (MSG2)/IAA19* (only present in this cluster). *YUC8* was present in cluster 2 and most *SMALL AUXIN UPREGULATED (SAUR)*-like genes were represented in clusters 1 and 2 (92 %, Chi-square test:  $P < 0.01$ ). These observations indicate that prolonged shade not only enhances the physiological growth response but also the auxin-related molecular signature. Genes whose expression was only moderately increased or decreased in response to shade were grouped in clusters 3 and 4, respectively.

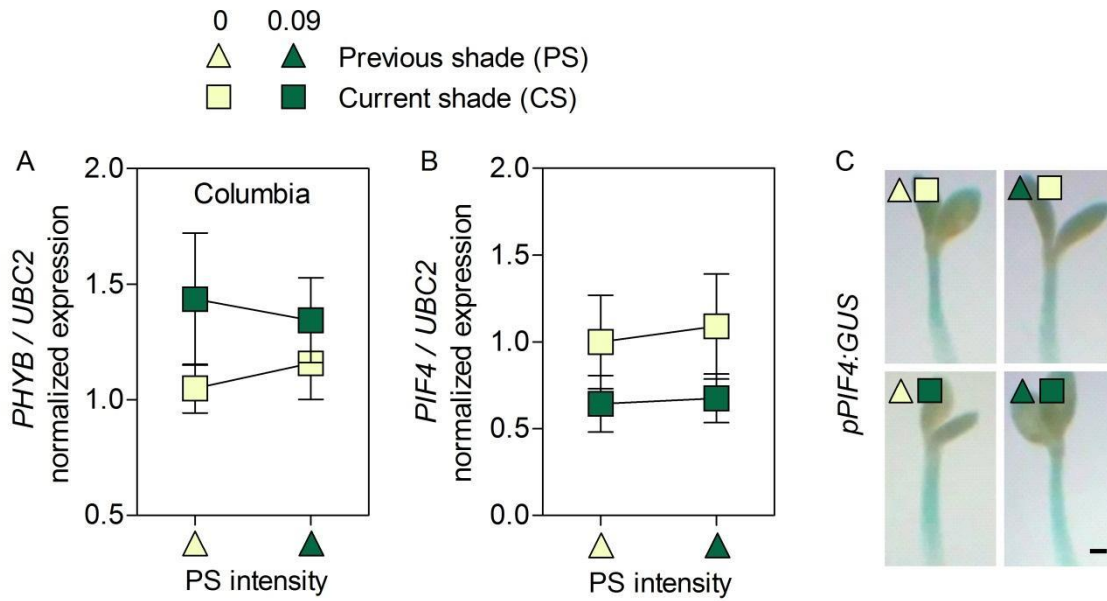

**Fig. S4.** Persistent shade does not significantly affect the expression of the *PHYB* or *PIF4* genes. *Arabidopsis* seedlings were exposed to different shade conditions during day 3 (previous shade, PS) followed by different shade conditions during the first 3 h of day 4 (current shade, CS) and harvested at the end of these 3 h. A, *PHYB*. B-C, *PIF4*. A-B, Real-Time PCR data. Means  $\pm$ SE of 3 biological replicates. C, Representative seedlings stained by GUS activity, Bar= 100  $\mu$ m.



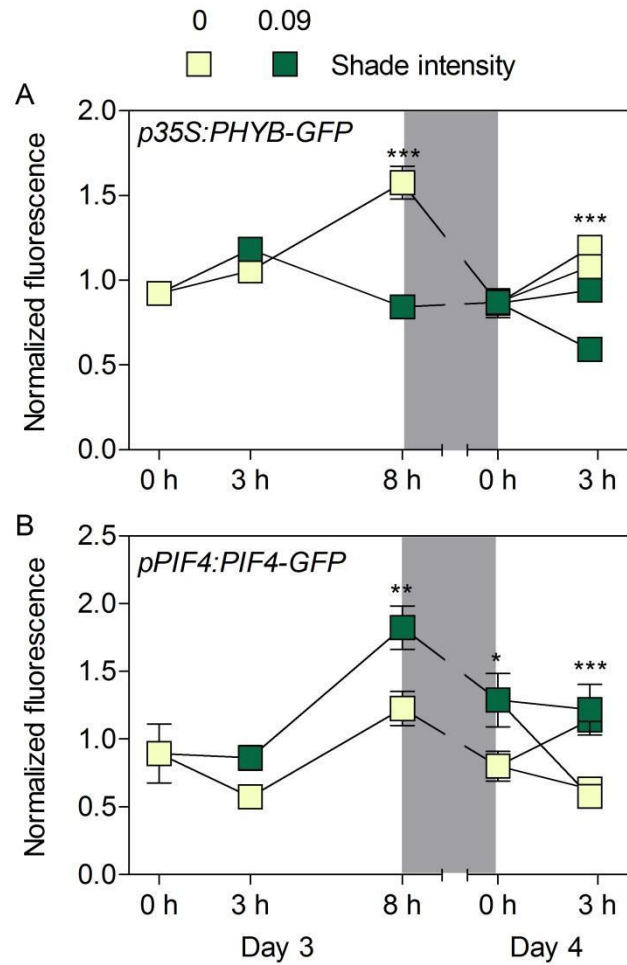

**Fig. S5.** Kinetics of nuclear phyB and PIF4 abundance in the epidermis and first sub-epidermal cell layers of the hypocotyl of *Arabidopsis* seedlings. A. Fluorescence driven by the *p35S:PHYB-YFP* transgene (27). B. Fluorescence driven by the *pPIF4:PIF4-GFP* transgene. Means  $\pm$ SE (whenever larger than the symbols) of 30-40 biological replicates. Data shown for 3 h of day 4 are the same data included in Fig. 3A (phyB) and Fig. 4A (PIF4, hypocotyl epidermal and first sub-epidermal cell layers).

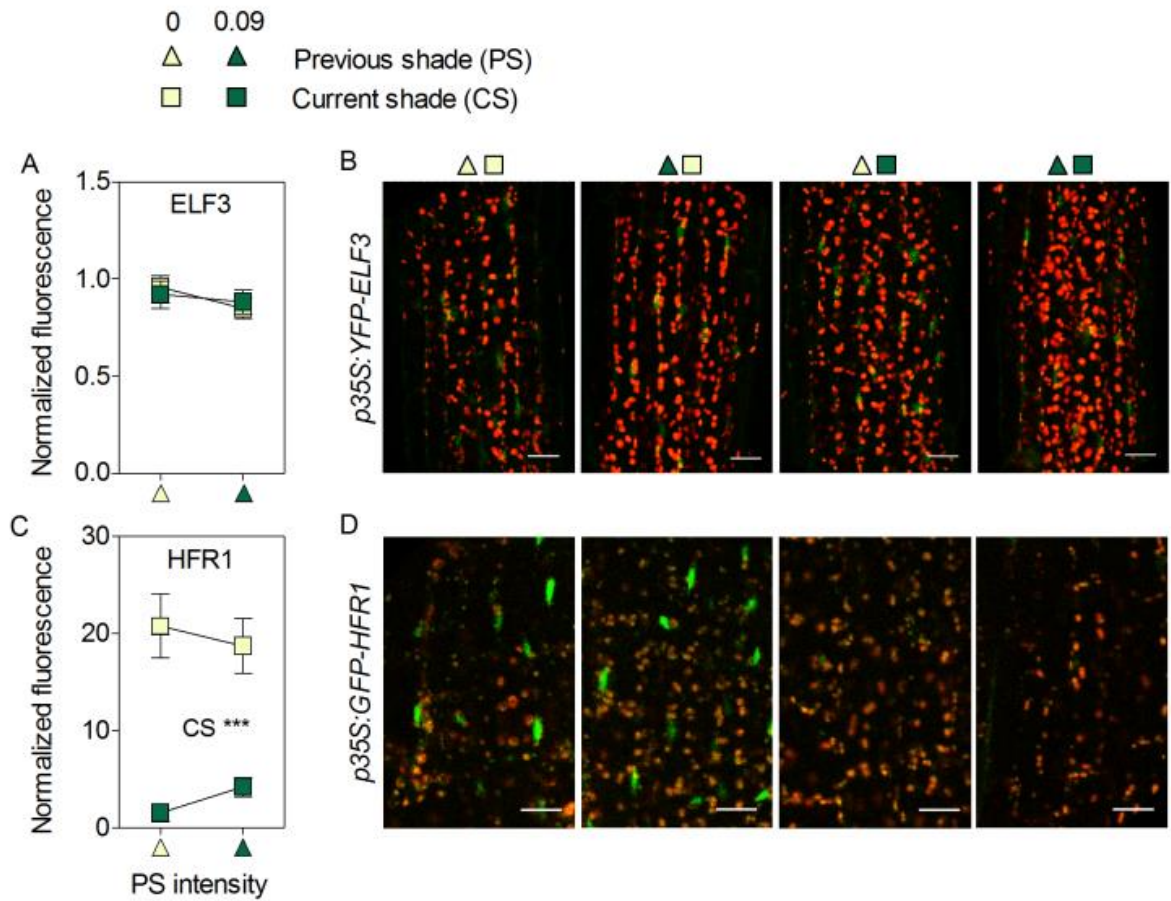

**Fig. S6.** Dynamics of the negative regulators of PIF4 activity ELF3 and HFR1. Nuclear fluorescence driven by the *p35S:YFP-ELF3* (A) and *p35S:GFP-HFR1* (C) transgenes in epidermal and sub-epidermal cells of the hypocotyl in *Arabidopsis* seedlings as affected by current shade (CS) and previous shade (PS). A, C, Means  $\pm$ SE of 20-35 seedlings. B, D, Representative images. \*\*\*,  $P < 0.001$ . Bar= 20  $\mu$ m.

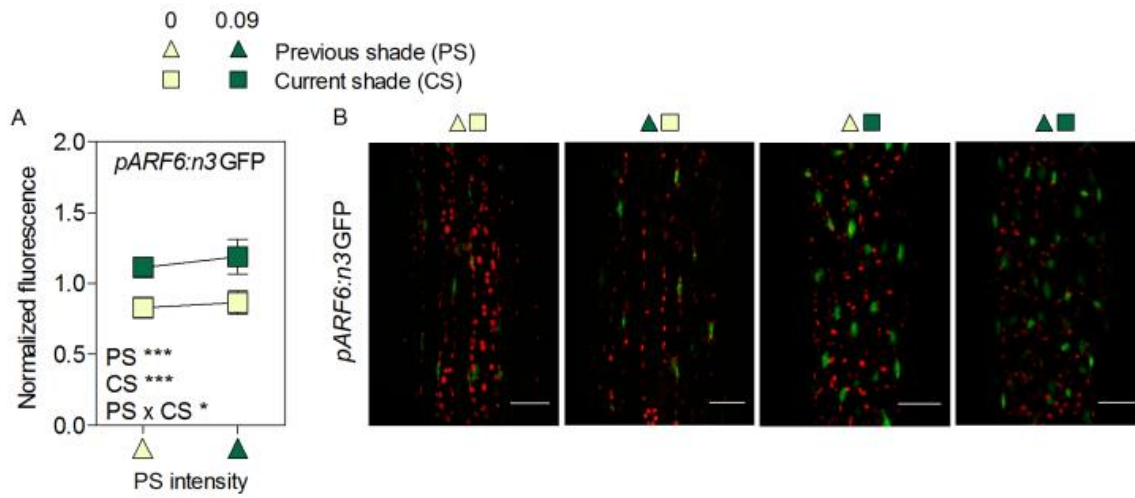

**Fig. S7.** The expression of the *ARF6* promoter is enhanced by shade. **A**, Fluorescence driven by the *pARF6-n3GFP* transgene in epidermal and sub-epidermal cells of the hypocotyl in *Arabidopsis* seedlings as affected by current shade (CS) and previous shade (PS). Means  $\pm$ SE of 36 seedlings. **B**, representative images. \*,  $P < 0.05$ ; \*\*\*,  $P < 0.001$ . Bar= 35  $\mu$ m.

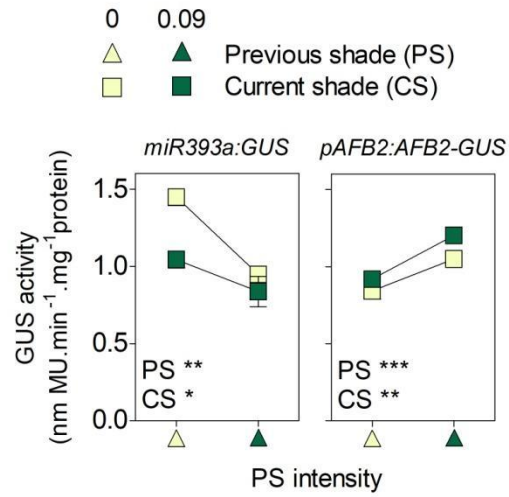

**Fig. S8.** Persistent shade modifies auxin perception and signaling to promote growth. GUS activity driven by the *pMIR393a:GUS* or the *pAFB2:AFB2-GUS* transgene is enhanced by prolonged shade. Means  $\pm$ SE (whenever larger than the symbols) of 3 biological replicates. \*,  $P < 0.05$ ; \*\*,  $P < 0.01$ ; \*\*\*,  $P < 0.001$ .

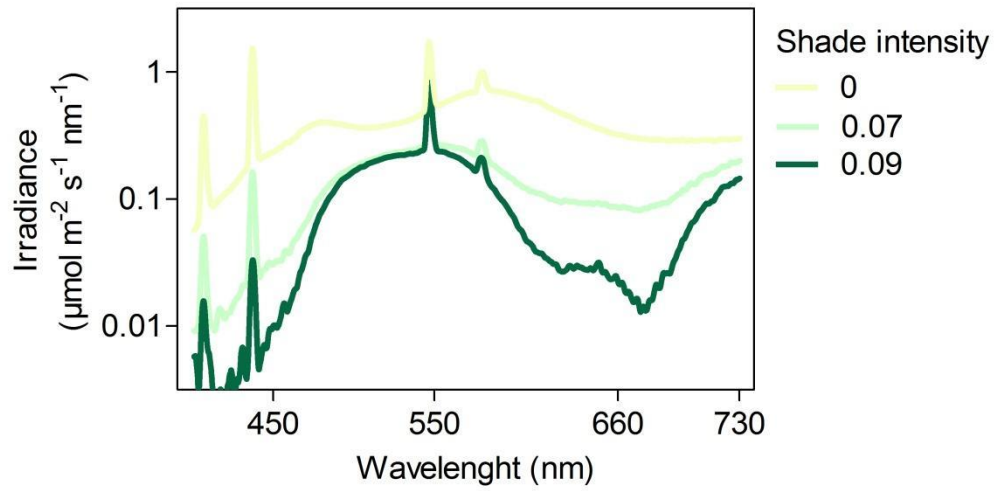

**Fig. S9.** Spectral photon distribution of the light used in experiments with *Arabidopsis* under controlled conditions. The photon irradiance is shown in log scale. Shade intensity=0 corresponds to simulated sunlight.

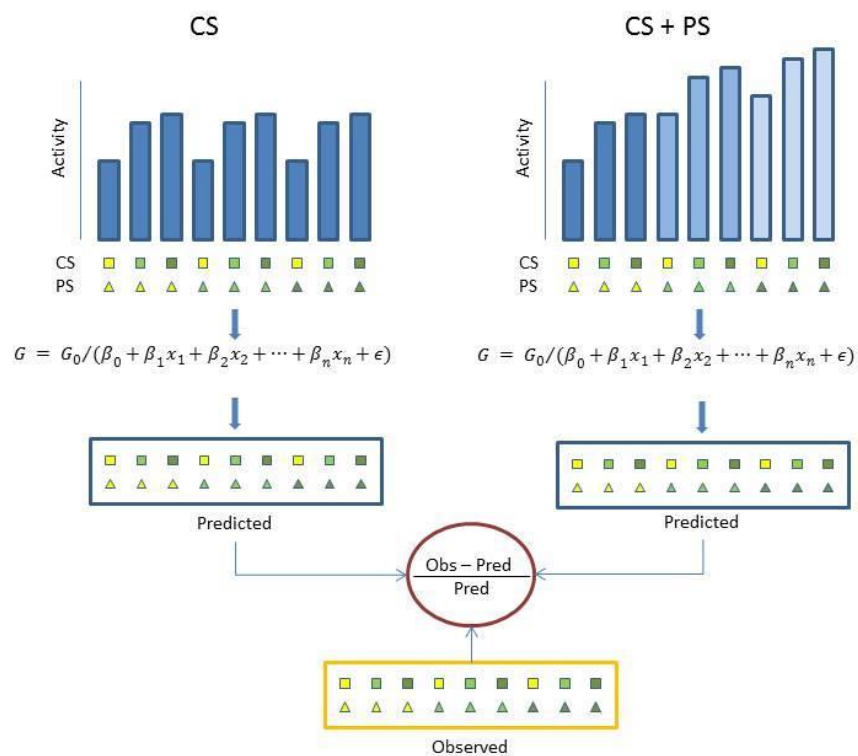

**Fig. S10.** Protocol used to evaluate the statistical significance of the changes in activity of different components of the auxin network caused by previous shade (PS) conditions. A model was parameterized either using the activities established by the different degrees of current shade (CS) ignoring PS conditions or the activities established by the corresponding combination of CS and PS (CS+PS). The moduli of the difference between observed and predicted data (relative to predicted) were compared by *t* tests.

**Table S1.** Expression pattern of auxin-related genes in the leaf and petiole of soybean plants grown in the glasshouse and exposed either to sunlight or to simulated shadelight during the day of harvest and the previous day (four combinations of current and previous shade conditions). The log2 fold-change between a given shade condition and the controls that remained under sunlight both days is indicated when significant at a false discovery rate <XXXX

C= Cluster number.

log2 fold change= 0,0 indicates that it is statistically not significantly different from 0

- Sunlight during harvest day
- Shadelight during harvest day
- ▲ Sunlight during the day before harvest
- ▲ Shadelight during the day before harvest

| ID            | Description                                                      | C | Leaf |     |     |     | Petiole |     |     |     |
|---------------|------------------------------------------------------------------|---|------|-----|-----|-----|---------|-----|-----|-----|
|               |                                                                  |   | ▲●   | ▲●  | ▲●  | ▲●  | ▲●      | ▲●  | ▲●  | ▲●  |
| GLYMA12G14670 | (1 of 252) PF02519 - Auxin responsive protein (Auxin_inducible)  | 1 | 0,0  | 0,0 | 0,0 | 3,4 | 0,0     | 0,0 | 0,0 | 2,9 |
| GLYMA12G15110 | SAUR-like auxin-responsive protein family                        | 1 | 0,0  | 0,0 | 0,0 | 2,8 | 0,0     | 1,6 | 1,5 | 2,5 |
| GLYMA12G03890 | (1 of 252) PF02519 - Auxin responsive protein (Auxin_inducible)  | 1 | 0,0  | 0,0 | 0,0 | 2,4 | 0,0     | 1,8 | 0,0 | 2,4 |
| GLYMA11G03850 | HAT2, Homeobox-leucine zipper protein 4 (HB-4) / HD-ZIP protein  | 1 | 0,0  | 2,5 | 0,7 | 2,2 | 0,0     | 1,4 | 0,0 | 1,8 |
| GLYMA17G12080 | (1 of 53) K14484 - auxin-responsive protein IAA (IAA)            | 1 | 0,0  | 2,8 | 0,0 | 2,2 | 0,0     | 0,0 | 0,0 | 0,0 |
| GLYMA02G16090 | (1 of 53) K14484 - auxin-responsive protein IAA (IAA)            | 1 | 0,0  | 0,0 | 0,0 | 2,2 | 0,0     | 0,0 | 0,0 | 1,2 |
| GLYMA19G34380 | (1 of 53) K14484 - auxin-responsive protein IAA (IAA)            | 1 | 0,0  | 1,2 | 1,3 | 2,0 | 0,0     | 0,0 | 0,0 | 2,1 |
| GLYMA19G34370 | (1 of 53) K14484 - auxin-responsive protein IAA (IAA)            | 1 | 0,0  | 1,1 | 1,2 | 2,0 | 0,0     | 1,4 | 0,0 | 1,5 |
| GLYMA03G31530 | (1 of 53) K14484 - auxin-responsive protein IAA (IAA)            | 1 | 0,0  | 1,1 | 1,5 | 2,0 | 0,0     | 1,1 | 0,9 | 1,9 |
| GLYMA12G14606 | SAUR-like auxin-responsive protein family                        | 1 | 0,0  | 0,0 | 0,0 | 1,9 | 0,0     | 0,0 | 0,0 | 2,1 |
| GLYMA06G43430 | (1 of 252) PF02519 - Auxin responsive protein                    | 1 | 0,0  | 1,5 | 0,0 | 1,9 | 0,0     | 0,0 | 0,0 | 2,1 |
| GLYMA08G22190 | IAA19, MSG2, indole-3-acetic acid inducible 19                   | 1 | 0,0  | 2,4 | 1,3 | 1,8 | 0,0     | 0,0 | 0,0 | 1,2 |
| GLYMA15G01560 | (1 of 4) PTHR31734:SF12 - AUXIN-RESPONSIVE PROTEIN IAA19-RELATED | 1 | 0,0  | 0,0 | 0,0 | 1,8 | 0,0     | 1,5 | 1,8 | 2,4 |

|               |            |                                                         |   |     |     |     |     |     |     |      |     |
|---------------|------------|---------------------------------------------------------|---|-----|-----|-----|-----|-----|-----|------|-----|
| GLYMA09G20580 | (1 of 19)  | K13947 - auxin efflux carrier family (PIN)              | 1 | 0,0 | 1,6 | 1,0 | 1,8 | 0,0 | 1,8 | 0,0  | 1,0 |
| GLYMA03G31520 | (1 of 53)  | K14484 - auxin-responsive protein IAA (IAA)             | 1 | 0,0 | 0,8 | 1,2 | 1,7 | 0,0 | 1,4 | 0,0  | 1,7 |
| GLYMA12G03960 | (1 of 252) | PF02519 - Auxin responsive protein                      | 1 | 0,0 | 0,0 | 0,0 | 1,7 | 0,0 | 0,0 | 0,0  | 1,6 |
| GLYMA15G01550 | (1 of 2)   | PTHR31734:SF34 - AUXIN-RESPONSIVE                       | 1 | 0,0 | 0,0 | 1,6 | 1,7 | 0,0 | 1,8 | 1,9  | 1,7 |
| GLYMA12G03930 | (1 of 252) | PF02519 - Auxin responsive protein (Auxin_inducible)    | 1 | 0,0 | 0,0 | 1,0 | 1,6 | 0,0 | 0,0 | 0,0  | 1,8 |
| GLYMA09G35520 | (1 of 252) | PF02519 - Auxin responsive protein                      | 1 | 0,0 | 0,0 | 0,0 | 1,6 | 0,0 | 0,0 | 0,0  | 1,7 |
| GLYMA17G15380 |            | ATHB-2, ATHB2, HAT4, HB-2, homeobox protein 2           | 1 | 0,0 | 2,2 | 0,0 | 1,6 | 0,0 | 0,0 | -1,2 | 1,3 |
| GLYMA06G43270 | (1 of 252) | PF02519 - Auxin responsive protein                      | 1 | 0,0 | 1,2 | 0,0 | 1,6 | 0,0 | 0,0 | 0,0  | 2,2 |
| GLYMA12G03920 | (1 of 252) | PF02519 - Auxin responsive protein                      | 1 | 0,0 | 0,0 | 0,0 | 1,5 | 0,0 | 0,0 | 0,0  | 1,7 |
| GLYMA06G43350 |            | SAUR-like auxin-responsive protein family               | 1 | 0,0 | 0,0 | 0,0 | 1,5 | 0,0 | 0,0 | 0,0  | 1,6 |
| GLYMA02G16080 | (1 of 53)  | K14484 - auxin-responsive protein IAA (IAA)             | 1 | 0,0 | 0,8 | 1,1 | 1,5 | 0,0 | 0,0 | 0,0  | 1,6 |
| GLYMA07G22340 |            | Auxin efflux carrier component-K7L258                   | 1 | 0,0 | 1,4 | 0,0 | 1,4 | 0,0 | 0,0 | 0,0  | 0,8 |
| GLYMA08G16500 | (1 of 252) | PF02519 - Auxin responsive protein                      | 1 | 0,0 | 0,0 | 0,0 | 1,4 | 0,0 | 0,0 | 1,4  | 2,1 |
| GLYMA07G03840 | (1 of 4)   | PTHR31734:SF12 - AUXIN-RESPONSIVE PROTEIN IAA19-RELATED | 1 | 0,0 | 1,6 | 1,1 | 1,4 | 0,0 | 1,9 | 0,0  | 1,4 |
| GLYMA13G43780 | (1 of 4)   | PTHR31734:SF12 - AUXIN-RESPONSIVE PROTEIN IAA19-RELATED | 1 | 0,0 | 0,0 | 1,1 | 1,4 | 0,0 | 1,9 | 1,4  | 2,4 |
| GLYMA20G35280 | (1 of 4)   | PTHR31734:SF11 - AUXIN-RESPONSIVE PROTEIN IAA1-RELATED  | 1 | 0,0 | 0,0 | 0,7 | 1,4 | 0,0 | 1,2 | 0,0  | 1,4 |
| GLYMA13G18910 | (1 of 4)   | PTHR31734:SF6 - AUXIN-RESPONSIVE PROTEIN IAA10-RELATED  | 1 | 0,0 | 0,0 | 0,0 | 1,4 | 0,0 | 0,9 | 0,0  | 1,1 |
| GLYMA09G35570 | (1 of 252) | PF02519 - Auxin responsive protein                      | 1 | 0,0 | 0,0 | 0,0 | 1,3 | 0,0 | 0,0 | 0,0  | 1,6 |
| GLYMA10G03720 | (1 of 53)  | K14484 - auxin-responsive protein IAA (IAA)             | 1 | 0,0 | 0,8 | 0,8 | 1,3 | 0,0 | 0,0 | 0,0  | 1,9 |
| GLYMA02G16071 | (1 of 3)   | PTHR31734:SF30 - AUXIN-RESPONSIVE PROTEIN IAA14-RELATED | 1 | 0,0 | 0,7 | 0,9 | 1,3 | 0,0 | 0,0 | 0,9  | 1,7 |



|                          |                                                                                                                          |   |     |     |     |     |     |     |     |     |
|--------------------------|--------------------------------------------------------------------------------------------------------------------------|---|-----|-----|-----|-----|-----|-----|-----|-----|
| GLYMA06G43150 (1 of 252) | PF02519 - Auxin responsive protein                                                                                       | 1 | 0,0 | 0,0 | 0,0 | 1,3 | 0,0 | 0,0 | 0,0 | 1,4 |
| GLYMA06G43380            | SAUR-like auxin-responsive protein family                                                                                | 1 | 0,0 | 0,0 | 0,0 | 1,3 | 0,0 | 0,0 | 0,0 | 1,7 |
| GLYMA10G03710 (1 of 53)  | K14484 - auxin-responsive protein IAA (IAA)                                                                              | 1 | 0,0 | 0,0 | 0,9 | 1,2 | 0,0 | 1,3 | 0,0 | 1,6 |
| GLYMA06G11540            | LAX3, like AUX1 3                                                                                                        | 1 | 0,0 | 1,2 | 0,0 | 1,2 | 0,0 | 0,0 | 0,0 | 1,1 |
| GLYMA09G35460 (1 of 252) | PF02519 - Auxin responsive protein                                                                                       | 1 | 0,0 | 1,1 | 0,0 | 1,1 | 0,0 | 0,0 | 0,0 | 2,4 |
| GLYMA09G35510 (1 of 252) | PF02519 - Auxin responsive protein                                                                                       | 1 | 0,0 | 0,0 | 0,0 | 1,1 | 0,0 | 0,0 | 0,0 | 1,7 |
| GLYMA04G43150 (1 of 2)   | PTHR22950:SF3 - AUXIN TRANSPORTER-LIKE PROTEIN 2-RELATED                                                                 | 1 | 0,0 | 1,0 | 0,0 | 1,0 | 0,0 | 0,0 | 0,0 | 1,0 |
| GLYMA09G14090            | ATCIPK6, CIPK6, SIP3, SNRK3.14, SOS3-interacting                                                                         | 1 | 0,0 | 0,0 | 0,8 | 1,0 | 0,0 | 0,0 | 1,0 | 1,4 |
| GLYMA01G00510 (1 of 36)  | PF02309//PF02362//PF06507 - AUX/IAA family (AUX_IAA) // B3 DNA binding domain (B3) // Auxin response factor (Auxin_resp) | 1 | 0,0 | 1,3 | 0,0 | 1,0 | 0,0 | 0,0 | 0,0 | 0,9 |
| GLYMA09G35620 (1 of 4)   | PTHR31374:SF41 - AUXIN-INDUCED PROTEIN-LIKE-RELATED                                                                      | 1 | 0,0 | 0,0 | 0,0 | 1,0 | 0,0 | 0,0 | 0,0 | 0,9 |
| GLYMA13G17270 (1 of 4)   | PTHR31384:SF21 - AUXIN RESPONSE FACTOR 19-RELATED                                                                        | 1 | 0,0 | 2,3 | 0,0 | 0,9 | 0,0 | 0,0 | 0,0 | 0,0 |
| GLYMA09G35580 (1 of 252) | PF02519 - Auxin responsive protein                                                                                       | 1 | 0,0 | 0,0 | 0,0 | 0,8 | 0,0 | 0,0 | 0,0 | 1,7 |
| GLYMA20G35270 (1 of 3)   | PTHR31734:SF30 - AUXIN-RESPONSIVE PROTEIN IAA14-RELATED                                                                  | 1 | 0,0 | 0,0 | 0,0 | 0,8 | 0,0 | 0,0 | 0,0 | 0,9 |
| GLYMA03G09100 (1 of 5)   | PTHR22950:SF256 - AUXIN TRANSPORTER PROTEIN 1-RELATED                                                                    | 1 | 0,0 | 2,0 | 0,0 | 0,8 | 0,0 | 0,0 | 0,0 | 0,0 |
| GLYMA10G32340            | IAA14, SLR, indole-3-acetic acid inducible 14                                                                            | 1 | 0,0 | 0,0 | 0,0 | 0,6 | 0,0 | 0,0 | 0,0 | 1,7 |
| GLYMA06G00950            | SAUR-like auxin-responsive protein family                                                                                | 2 | 0,0 | 2,0 | 0,0 | 0,0 | 0,0 | 0,0 | 0,0 | 2,5 |
| GLYMA09G35430 (1 of 252) | PF02519 - Auxin responsive protein                                                                                       | 2 | 0,0 | 0,0 | 0,0 | 0,0 | 0,0 | 0,0 | 0,0 | 2,7 |
| GLYMA09G08350            | ARF11, ARF19, IAA22, auxin response factor 19                                                                            | 2 | 0,0 | 1,8 | 0,0 | 0,0 | 0,0 | 0,0 | 0,0 | 0,0 |

|                                                                                                                                         |     |     |      |     |     |     |     |     |     |  |
|-----------------------------------------------------------------------------------------------------------------------------------------|-----|-----|------|-----|-----|-----|-----|-----|-----|--|
| GLYMA19G42060 (1 of 4) PTHR33565:SF1 - 2                                                                                                | 0,0 | 2,3 | 0,0  | 0,0 | 0,0 | 0,0 | 0,0 | 0,0 | 0,0 |  |
| DORMANCY/AUXIN ASSOCIATED PROTEIN                                                                                                       |     |     |      |     |     |     |     |     |     |  |
| GLYMA13G27800 AILP1, ATAILP1, Aluminium induced protein with YGL and LRDR motifs                                                        | 2   | 0,0 | 1,6  | 0,0 | 0,0 | 0,0 | 0,0 | 0,0 | 0,0 |  |
| GLYMA04G02760 SAUR-like protein family auxin-responsive                                                                                 | 2   | 0,0 | 0,0  | 0,0 | 0,0 | 0,0 | 0,0 | 0,0 | 1,3 |  |
| GLYMA12G03830 SAUR-like protein family auxin-responsive                                                                                 | 2   | 0,0 | 0,0  | 0,0 | 0,0 | 0,0 | 0,0 | 0,0 | 1,5 |  |
| GLYMA04G00920 (1 of 4) PTHR31374:SF41 - 2                                                                                               | 0,0 | 1,8 | -0,9 | 0,0 | 0,0 | 0,0 | 0,0 | 0,0 | 1,9 |  |
| AUXIN-INDUCED PROTEIN-LIKE-RELATED                                                                                                      |     |     |      |     |     |     |     |     |     |  |
| GLYMA06G00841 (1 of 252) PF02519 - Auxin responsive protein                                                                             | 2   | 0,0 | 0,0  | 0,0 | 0,0 | 0,0 | 1,4 | 0,0 | 2,1 |  |
| GLYMA09G35560 (1 of 252) PF02519 - Auxin responsive protein                                                                             | 2   | 0,0 | 0,0  | 0,0 | 0,0 | 0,0 | 0,0 | 0,0 | 1,0 |  |
| GLYMA12G15360 MAX2, ORE9, PPS, RNI-like superfamily protein                                                                             | 2   | 0,0 | 1,6  | 0,0 | 0,0 | 0,0 | 0,0 | 0,0 | 0,0 |  |
| GLYMA13G17400 SAUR-like protein family auxin-responsive                                                                                 | 2   | 0,0 | 0,0  | 0,0 | 0,0 | 0,0 | 0,0 | 0,0 | 0,9 |  |
| GLYMA07G02080 IAA27, PAP2, phytochrome-associated protein 2                                                                             | 2   | 0,0 | 0,0  | 0,0 | 0,0 | 0,0 | 2,4 | 0,0 | 2,3 |  |
| GLYMA02G44040 B73, CHL6, CNX, CNX1, SIR4, molybdopterin biosynthesis CNX1 protein / molybdenum cofactor biosynthesis enzyme CNX1 (CNX1) | 2   | 0,0 | 1,9  | 0,0 | 0,0 | 0,0 | 0,0 | 0,0 | 0,0 |  |
| GLYMA12G03990 (1 of 4) PTHR31374:SF41 - 2                                                                                               | 0,0 | 0,0 | -0,6 | 0,0 | 0,0 | 0,0 | 0,0 | 0,0 | 1,3 |  |
| AUXIN-INDUCED PROTEIN-LIKE-RELATED                                                                                                      |     |     |      |     |     |     |     |     |     |  |
| GLYMA05G02863 ATBT2, BT2, BTB and TAZ domain protein 2                                                                                  | 2   | 0,0 | 1,5  | 0,0 | 0,0 | 0,0 | 0,0 | 0,0 | 0,0 |  |
| GLYMA10G32330 IAA3, SHY2, AUX/IAA transcriptional regulator family                                                                      | 2   | 0,0 | 0,0  | 0,0 | 0,0 | 0,0 | 1,2 | 0,0 | 1,2 |  |
| GLYMA09G35540 (1 of 252) PF02519 - Auxin responsive protein (Auxin_inducible)                                                           | 2   | 0,0 | 0,0  | 0,0 | 0,0 | 0,0 | 2,1 | 0,0 | 2,4 |  |
| GLYMA08G21740 (1 of 4) PTHR31734:SF5 - 2                                                                                                | 0,0 | 0,0 | 0,0  | 0,0 | 0,0 | 0,0 | 0,0 | 0,0 | 1,2 |  |
| AUXIN-RESPONSIVE                                                                                                                        |     |     |      |     |     |     |     |     |     |  |
| GLYMA06G47960 CNX7, SIR5, co-factor for nitrate, reductase and xanthine dehydrogenase 7                                                 | 2   | 0,0 | 1,8  | 0,0 | 0,0 | 0,0 | 0,0 | 0,0 | 0,0 |  |
| GLYMA09G35290 SAUR-like protein family auxin-responsive                                                                                 | 2   | 0,0 | 0,0  | 0,0 | 0,0 | 0,0 | 0,0 | 0,0 | 2,5 |  |
| GLYMA06G43505 SAUR-like protein family auxin-responsive                                                                                 | 2   | 0,0 | 0,0  | 0,0 | 0,0 | 0,0 | 0,0 | 0,0 | 2,1 |  |

|               |                                                                 |   |     |     |     |     |     |     |      |     |
|---------------|-----------------------------------------------------------------|---|-----|-----|-----|-----|-----|-----|------|-----|
| GLYMA04G36040 | TAR2, tryptophan aminotransferase related 2                     | 2 | 0,0 | 0,0 | 0,0 | 0,0 | 0,0 | 0,0 | 1,2  | 1,5 |
| GLYMA09G35600 | SAUR-like auxin-responsive protein family                       | 2 | 0,0 | 0,0 | 0,0 | 0,0 | 0,0 | 0,0 | 0,0  | 2,1 |
| GLYMA09G14560 | BT1, BTB and TAZ domain                                         | 2 | 0,0 | 1,6 | 0,0 | 0,0 | 0,0 | 0,0 | 0,0  | 0,0 |
| GLYMA13G19100 | YUC8, Flavin-binding monooxygenase family protein               | 2 | 0,0 | 0,0 | 0,0 | 0,0 | 0,0 | 0,0 | 0,0  | 1,0 |
| GLYMA12G03840 | (1 of 252) PF02519 - Auxin responsive protein                   | 2 | 0,0 | 0,0 | 0,0 | 0,0 | 0,0 | 0,0 | 0,0  | 1,6 |
| GLYMA17G15200 | (1 of 16) PF05703 - Auxin canalisation (Auxin_canalis)          | 2 | 0,0 | 0,0 | 0,0 | 0,0 | 0,0 | 0,0 | 0,0  | 1,1 |
| GLYMA12G03810 | (1 of 252) PF02519 - Auxin responsive protein                   | 2 | 0,0 | 0,0 | 0,0 | 0,0 | 0,0 | 0,0 | 0,0  | 2,4 |
| GLYMA06G00851 | (1 of 252) PF02519 - Auxin responsive protein                   | 2 | 0,0 | 0,0 | 0,0 | 0,0 | 0,0 | 0,0 | 0,0  | 2,7 |
| GLYMA12G14760 | (1 of 252) PF02519 - Auxin responsive protein (Auxin_inducible) | 2 | 0,0 | 0,0 | 0,0 | 0,0 | 0,0 | 0,0 | 0,0  | 2,1 |
| GLYMA12G29720 | (1 of 5) PTHR31384:SF27 - AUXIN RESPONSE FACTOR 10-RELATED      | 2 | 0,0 | 1,6 | 0,0 | 0,0 | 0,0 | 0,0 | 0,0  | 0,0 |
| GLYMA12G15090 | (1 of 252) PF02519 - Auxin responsive protein (Auxin_inducible) | 2 | 0,0 | 0,0 | 0,0 | 0,0 | 0,0 | 1,8 | 0,0  | 2,8 |
| GLYMA12G03880 | (1 of 252) PF02519 - Auxin responsive protein (Auxin_inducible) | 2 | 0,0 | 0,0 | 0,0 | 0,0 | 0,0 | 0,0 | 0,0  | 2,6 |
| GLYMA09G08490 | (1 of 252) PF02519 - Auxin responsive protein (Auxin_inducible) | 2 | 0,0 | 1,7 | 0,0 | 0,0 | 0,0 | 0,0 | -1,2 | 0,0 |
| GLYMA06G43181 | (1 of 252) PF02519 - Auxin responsive protein (Auxin_inducible) | 2 | 0,0 | 0,0 | 0,0 | 0,0 | 0,0 | 0,0 | 0,0  | 1,7 |
| GLYMA06G43190 | (1 of 252) PF02519 - Auxin responsive protein                   | 2 | 0,0 | 0,0 | 0,0 | 0,0 | 0,0 | 0,0 | 0,0  | 2,5 |
| GLYMA09G35440 | (1 of 252) PF02519 - Auxin responsive protein                   | 2 | 0,0 | 2,5 | 0,0 | 0,0 | 0,0 | 0,0 | 0,0  | 2,2 |
| GLYMA09G35400 | (1 of 252) PF02519 - Auxin responsive protein                   | 2 | 0,0 | 0,0 | 0,0 | 0,0 | 0,0 | 0,0 | 0,0  | 2,3 |
| GLYMA09G35420 | (1 of 252) PF02519 - Auxin responsive protein                   | 5 | 0,0 | 4,0 | 0,0 | 3,2 | 0,0 | 2,5 | 0,0  | 2,5 |
| GLYMA06G07130 | IAA29, indole-3-acetic acid inducible 29                        | 5 | 0,0 | 2,1 | 0,0 | 1,5 | 0,0 | 3,0 | 1,1  | 2,1 |
| GLYMA04G07040 | (1 of 53) K14484 - auxin-responsive protein IAA (IAA)           | 5 | 0,0 | 2,7 | 0,0 | 1,4 | 0,0 | 3,0 | 0,0  | 1,7 |
| GLYMA09G35390 | (1 of 252) PF02519 - Auxin responsive protein                   | 5 | 0,0 | 2,7 | 0,0 | 0,0 | 0,0 | 3,3 | 0,0  | 2,6 |

GLYMA20G38100 (1 of 4) PTHR33565:SF1 - 6 0,0 5,9 0,0 2,4 0,0 0,0 0,0 0,0  
 DORMANCY/AUXIN  
 ASSOCIATED PROTEIN

GLYMA10G29190 (1 of 4) PTHR33565:SF1 - 6 0,0 4,6 0,0 1,8 0,0 0,0 0,0 0,0  
 DORMANCY/AUXIN  
 ASSOCIATED PROTEIN

GLYMA13G31060 (1 of 8) PF05564 - 6 0,0 4,7 0,0 0,0 0,0 0,0 0,0 0,0  
 Dormancy/auxin associated  
 protein (Auxin\_repressed)

GLYMA15G08300 (1 of 8) PF05564 - 6 0,0 3,9 0,0 0,0 0,0 0,0 0,0 0,0  
 Dormancy/auxin associated  
 protein (Auxin\_repressed)

GLYMA06G12120 ILL6, IAA-leucine resistant (ILR)- 6 0,0 3,4 0,0 0,0 0,0 0,0 0,0 0,0  
 like gene 6

GLYMA12G29435 CVP2, DNase I-like superfamily 3 0,0 0,0 0,0 1,7 0,0 0,0 0,0 0,0  
 protein

GLYMA03G39450 (1 of 4) PTHR33565:SF1 - 3 0,0 0,0 0,9 1,6 0,0 0,0 0,0 0,0  
 DORMANCY/AUXIN  
 ASSOCIATED PROTEIN

GLYMA13G43800 AXR3, IAA17, AUX/IAA 3 0,0 0,0 1,5 1,2 0,0 0,0 1,2 0,0  
 transcriptional regulator family  
 protein

GLYMA09G33630 (1 of 4) PTHR31734:SF24 - 3 0,0 0,0 1,0 1,0 0,0 0,0 0,0 0,7  
 AUXIN-RESPONSIVE

GLYMA03G17450 (1 of 5) PTHR31384:SF1 - 3 0,0 0,0 0,0 0,8 0,0 0,0 0,0 0,0  
 AUXIN RESPONSE FACTOR  
 12-RELATED

GLYMA02G40650 (1 of 6) PTHR31384:SF2 - 3 0,0 0,0 0,0 0,7 0,0 0,0 0,0 0,0  
 AUXIN RESPONSE FACTOR 8

GLYMA20G36790 (1 of 4) PTHR31734:SF28 - 3 0,0 0,0 0,0 0,7 0,0 0,0 0,0 0,0  
 AUXIN-RESPONSIVE  
 PROTEIN IAA16

GLYMA01G25270 (1 of 5) PTHR31384:SF1 - 3 0,0 0,0 0,0 0,7 0,0 0,0 0,0 0,0  
 AUXIN RESPONSE FACTOR  
 12-RELATED

GLYMA13G30750 (1 of 4) PTHR31384:SF5 - 3 0,0 0,0 0,0 0,7 0,0 0,0 0,0 0,0  
 AUXIN RESPONSE FACTOR 3

GLYMA12G09860 ATE2FB, E2F1, E2FB, E2F 3 0,0 0,0 0,0 0,7 0,0 0,0 0,0 0,0  
 transcription factor 1

GLYMA07G15640 (1 of 36) 3 0,0 1,0 0,0 0,6 0,0 0,0 0,0 0,0  
 PF02309//PF02362//PF06507 -  
 AUX/IAA family (AUX\_IAA) // B3  
 DNA binding domain (B3) //  
 Auxin response factor

GLYMA03G41920 (1 of 3) PTHR31384:SF17 - 3 0,0 0,0 0,0 0,6 0,0 0,0 0,0 0,0  
 AUXIN RESPONSE FACTOR  
 11-RELATED

|                                                                                                                      |     |     |     |     |     |     |     |     |
|----------------------------------------------------------------------------------------------------------------------|-----|-----|-----|-----|-----|-----|-----|-----|
| GLYMA19G36571 (1 of 20) PF02362//PF06507 - 3                                                                         | 0,0 | 0,0 | 0,0 | 0,6 | 0,0 | 0,0 | 0,7 | 0,7 |
| B3 DNA binding domain (B3) //<br>Auxin response factor                                                               |     |     |     |     |     |     |     |     |
| GLYMA08G01100 (1 of 4) PTHR31384:SF8 - 3                                                                             | 0,0 | 0,0 | 0,0 | 0,6 | 0,0 | 0,0 | 0,0 | 0,0 |
| AUXIN RESPONSE FACTOR 2                                                                                              |     |     |     |     |     |     |     |     |
| GLYMA10G30440 (1 of 4) PTHR31734:SF28 - 3                                                                            | 0,0 | 0,0 | 0,0 | 0,6 | 0,0 | 0,0 | 0,0 | 0,0 |
| AUXIN-RESPONSIVE                                                                                                     |     |     |     |     |     |     |     |     |
| GLYMA07G16810 Probable glutathione S- 3                                                                              | 0,0 | 0,0 | 0,0 | 0,0 | 0,0 | 0,0 | 1,1 | 0,0 |
| transferase-HSP26-A                                                                                                  |     |     |     |     |     |     |     |     |
| GLYMA15G09750 (1 of 4) PTHR31384:SF3 - 3                                                                             | 0,0 | 0,0 | 1,2 | 0,0 | 0,0 | 0,0 | 0,0 | 0,0 |
| AUXIN RESPONSE FACTOR 6                                                                                              |     |     |     |     |     |     |     |     |
| GLYMA08G10550 ARF6, auxin response factor 6 3                                                                        | 0,0 | 1,0 | 0,0 | 0,0 | 0,0 | 0,0 | 0,0 | 0,0 |
| GLYMA20G32040 ARF16, auxin response factor 16 3                                                                      | 0,0 | 0,0 | 1,0 | 0,0 | 0,0 | 0,0 | 0,0 | 0,0 |
| GLYMA09G30700 Auxin efflux carrier component- 3                                                                      | 0,0 | 0,0 | 0,0 | 0,0 | 0,0 | 0,0 | 0,6 | 0,0 |
| PIN4b                                                                                                                |     |     |     |     |     |     |     |     |
| GLYMA05G36430 (1 of 36) 3                                                                                            | 0,0 | 0,6 | 0,0 | 0,0 | 0,0 | 0,0 | 0,0 | 0,0 |
| PF02309//PF02362//PF06507 -<br>AUX/IAA family (AUX_IAA) // B3<br>DNA binding domain (B3) //<br>Auxin response factor |     |     |     |     |     |     |     |     |
| GLYMA20G01760 Auxin efflux carrier component- 3                                                                      | 0,0 | 0,7 | 0,0 | 0,0 | 0,0 | 1,3 | 0,0 | 0,0 |
| LOC100802247                                                                                                         |     |     |     |     |     |     |     |     |
| GLYMA10G06080 (1 of 20) PF02362//PF06507 - 3                                                                         | 0,0 | 0,0 | 0,6 | 0,0 | 0,0 | 0,0 | 0,0 | 0,0 |
| B3 DNA binding domain (B3) //<br>Auxin response factor                                                               |     |     |     |     |     |     |     |     |
| GLYMA12G08110 ARF10, auxin response factor 10 3                                                                      | 0,0 | 0,9 | 0,0 | 0,0 | 0,0 | 0,0 | 0,0 | 0,0 |
| GLYMA02G38260 (1 of 4) PTHR31734:SF18 - 3                                                                            | 0,0 | 0,0 | 0,0 | 0,0 | 0,0 | 0,0 | 0,9 | 0,5 |
| AUXIN-RESPONSIVE                                                                                                     |     |     |     |     |     |     |     |     |
| GLYMA01G02350 (1 of 4) PTHR31734:SF24 - 3                                                                            | 0,0 | 0,0 | 0,0 | 0,0 | 0,0 | 0,0 | 0,0 | 0,6 |
| AUXIN-RESPONSIVE                                                                                                     |     |     |     |     |     |     |     |     |
| GLYMA07G17810 (1 of 5) PTHR22950:SF256 - 3                                                                           | 0,0 | 0,6 | 0,0 | 0,0 | 0,0 | 0,0 | 0,0 | 0,0 |
| AUXIN TRANSPORTER<br>PROTEIN 1-RELATED                                                                               |     |     |     |     |     |     |     |     |
| GLYMA19G27280 AFB3, auxin signaling F-box 3                                                                          | 0,0 | 1,3 | 0,0 | 0,0 | 0,0 | 0,0 | 0,0 | 0,0 |
| GLYMA18G02210 ATIPS2, ATMIPS2, MIPS2, myo- 3                                                                         | 0,0 | 0,0 | 0,5 | 0,0 | 0,0 | 0,0 | 0,0 | 0,0 |
| inositol-1-phosphate synthase 2                                                                                      |     |     |     |     |     |     |     |     |
| GLYMA15G02350 (1 of 4) PTHR31734:SF2 - 3                                                                             | 0,0 | 1,0 | 0,0 | 0,0 | 0,0 | 0,0 | 0,0 | 0,0 |
| AUXIN-RESPONSIVE<br>PROTEIN IAA18-RELATED                                                                            |     |     |     |     |     |     |     |     |
| GLYMA08G11030 Uncharacterized protein- 3                                                                             | 0,0 | 0,8 | 0,0 | 0,0 | 0,0 | 0,0 | 0,0 | 0,0 |
| LOC100775721                                                                                                         |     |     |     |     |     |     |     |     |

|                                                                                                                          |     |     |      |     |     |     |     |      |      |
|--------------------------------------------------------------------------------------------------------------------------|-----|-----|------|-----|-----|-----|-----|------|------|
| GLYMA10G04610 (1 of 4) PTHR31734:SF6                                                                                     | - 3 | 0,0 | 0,0  | 0,0 | 0,0 | 0,0 | 0,0 | 0,0  | 0,8  |
| AUXIN-RESPONSIVE<br>PROTEIN IAA10-RELATED                                                                                |     |     |      |     |     |     |     |      |      |
| GLYMA06G17320 (1 of 4) PTHR31384:SF8                                                                                     | - 3 | 0,0 | 0,8  | 0,0 | 0,0 | 0,0 | 0,0 | 0,0  | 0,0  |
| AUXIN RESPONSE FACTOR 2                                                                                                  |     |     |      |     |     |     |     |      |      |
| GLYMA04G09550 (1 of 4) PTHR31734:SF18                                                                                    | - 3 | 0,0 | 0,0  | 0,0 | 0,0 | 0,0 | 0,0 | 0,0  | 0,6  |
| AUXIN-RESPONSIVE                                                                                                         |     |     |      |     |     |     |     |      |      |
| GLYMA06G06850 ATSK21, BIN2, DWF12, SK21, UCU1, Protein kinase superfamily protein                                        | 3   | 0,0 | 0,7  | 0,0 | 0,0 | 0,0 | 0,0 | 0,0  | 0,0  |
| GLYMA13G40030 (1 of 5) PTHR31384:SF27                                                                                    | - 3 | 0,0 | 1,1  | 0,0 | 0,0 | 0,0 | 0,0 | 0,0  | 0,0  |
| AUXIN RESPONSE FACTOR<br>10-RELATED                                                                                      |     |     |      |     |     |     |     |      |      |
| GLYMA11G09390 (1 of 5) PTHR31651:SF5                                                                                     | - 3 | 0,0 | 0,8  | 0,0 | 0,0 | 0,0 | 0,0 | 0,0  | 0,0  |
| AUXIN EFFLUX CARRIER<br>FAMILY PROTEIN-RELATED                                                                           |     |     |      |     |     |     |     |      |      |
| GLYMA02G43410 DSPTP1E, IBR5, indole-3-butyric acid response 5                                                            | 3   | 0,0 | 0,9  | 0,0 | 0,0 | 0,0 | 0,0 | 0,0  | 0,0  |
| GLYMA12G04000 SAUR-like auxin-responsive protein family                                                                  | 3   | 0,0 | 0,0  | 0,0 | 0,0 | 0,0 | 0,0 | 0,0  | 0,8  |
| GLYMA09G00490 AtETR1, EIN1, ETR, ETR1, Signal transduction histidine kinase, hybrid-type, ethylene                       | 3   | 0,0 | 1,0  | 0,0 | 0,0 | 0,0 | 0,0 | 0,0  | 0,0  |
| GLYMA16G08960 CHY1, beta-hydroxyisobutyryl-CoA hydrolase 1                                                               | 3   | 0,0 | 0,5  | 0,0 | 0,0 | 0,0 | 0,0 | 0,0  | 0,0  |
| GLYMA08G37070 (1 of 4) PTHR31734:SF24                                                                                    | - 3 | 0,0 | 0,0  | 0,0 | 0,0 | 0,0 | 0,0 | 0,0  | 0,5  |
| AUXIN-RESPONSIVE                                                                                                         |     |     |      |     |     |     |     |      |      |
| GLYMA18G42640 (1 of 5) PTHR22950:SF256                                                                                   | - 3 | 0,0 | 0,0  | 0,0 | 0,0 | 0,0 | 0,0 | 0,8  | 0,0  |
| AUXIN TRANSPORTER<br>PROTEIN 1-RELATED                                                                                   |     |     |      |     |     |     |     |      |      |
| GLYMA06G47520 ATPHB3, PHB3, prohibitin 3                                                                                 | 4   | 0,0 | -2,5 | 0,7 | 0,0 | 0,0 | 0,0 | 0,0  | 0,0  |
| GLYMA16G21930 Auxin efflux carrier family protein                                                                        | 4   | 0,0 | -1,1 | 0,0 | 0,0 | 0,0 | 0,0 | 0,0  | 0,0  |
| GLYMA07G01601 ELF3, PYK20, hydroxyproline-rich glycoprotein family protein                                               | 4   | 0,0 | 0,0  | 0,0 | 0,0 | 0,0 | 0,0 | 0,0  | -1,4 |
| GLYMA06G45120 (1 of 4) PTHR31901:SF10                                                                                    | - 4 | 0,0 | 0,0  | 1,0 | 0,0 | 0,0 | 0,0 | 0,0  | -1,0 |
| AUXIN-RESPONSIVE GH3<br>FAMILY PROTEIN                                                                                   |     |     |      |     |     |     |     |      |      |
| GLYMA17G33985 ENP, MAB4, NPY1, Phototropic-responsive NPH3 family protein                                                | 4   | 0,0 | 0,0  | 0,0 | 0,0 | 0,0 | 0,0 | -0,7 | -1,3 |
| GLYMA15G15220 (1 of 1) PF00400//PF00439//PF06507 - WD domain, G-beta repeat (WD40) // Bromodomain (Bromodomain) // Auxin | 4   | 0,0 | 0,0  | 0,0 | 0,0 | 0,0 | 0,0 | 0,0  | -0,6 |
| GLYMA18G12660 ATRHM1, RHM1, ROL1, rhamnose biosynthesis 1                                                                | 4   | 0,0 | -2,7 | 0,0 | 0,0 | 0,0 | 0,0 | 0,0  | -1,1 |

|               |                                                                       |   |     |      |      |     |     |      |      |      |
|---------------|-----------------------------------------------------------------------|---|-----|------|------|-----|-----|------|------|------|
| GLYMA13G07250 | Putative uncharacterized protein-<br>LOC100783522                     | 4 | 0,0 | 0,6  | -0,6 | 0,0 | 0,0 | 0,0  | 0,0  | 0,0  |
| GLYMA20G35180 | ATMYB15, ATY19, MYB15, myb<br>domain protein 15                       | 4 | 0,0 | 0,0  | 0,0  | 0,0 | 0,0 | 0,0  | 0,0  | -1,2 |
| GLYMA10G02440 | GH3.9, putative indole-3-acetic<br>acid-amido synthetase GH3.9        | 4 | 0,0 | 0,0  | 0,0  | 0,0 | 0,0 | -2,0 | 0,0  | 0,0  |
| GLYMA13G20530 | ABCB1, ATPGP1, PGP1, ATP<br>binding cassette subfamily B1             | 4 | 0,0 | 0,0  | 0,0  | 0,0 | 0,0 | 0,0  | 0,0  | -0,8 |
| GLYMA04G08910 | ATCCD8, CCD8, MAX4,<br>carotenoid cleavage                            | 4 | 0,0 | 0,0  | 0,0  | 0,0 | 0,0 | 0,0  | 0,0  | -1,0 |
| GLYMA13G43050 | IAA26, PAP1, phytochrome-<br>associated protein 1                     | 4 | 0,0 | 0,0  | 0,0  | 0,0 | 0,0 | 0,0  | -0,8 | 0,0  |
| GLYMA07G16170 | (1 of 5) PTHR31384:SF1 -<br>AUXIN RESPONSE FACTOR<br>12-RELATED       | 4 | 0,0 | 1,1  | 0,0  | 0,0 | 0,0 | 0,0  | 0,0  | 0,0  |
| GLYMA07G01800 | (1 of 4) PTHR31734:SF2 -<br>AUXIN-RESPONSIVE<br>PROTEIN IAA18-RELATED | 4 | 0,0 | 0,0  | 0,0  | 0,0 | 0,0 | 0,0  | 0,0  | 0,8  |
| GLYMA03G31340 | (1 of 16) PF05703 - Auxin<br>canalisation (Auxin_canalis)             | 4 | 0,0 | 0,0  | 0,0  | 0,0 | 0,0 | 0,0  | -1,3 | -1,0 |
| GLYMA13G20540 | ATNUP160, NUP160, SAR1,<br>SUPPRESSOR OF AUXIN<br>RESISTANCE1         | 4 | 0,0 | -1,9 | 0,0  | 0,0 | 0,0 | 0,0  | 0,0  | 0,0  |
| GLYMA12G29280 | (1 of 5) PTHR31384:SF20 -<br>AUXIN RESPONSE FACTOR 4                  | 4 | 0,0 | -0,7 | 0,0  | 0,0 | 0,0 | 0,0  | 0,0  | -0,8 |
| GLYMA16G27440 | UGT74E2, Uridine diphosphate<br>glycosyltransferase 74E2              | 4 | 0,0 | -2,1 | 0,0  | 0,0 | 0,0 | 0,0  | 0,0  | -1,4 |
| GLYMA11G20490 | (1 of 5) PTHR31384:SF27 -<br>AUXIN RESPONSE FACTOR<br>10-RELATED      | 4 | 0,0 | 0,7  | 0,0  | 0,0 | 0,0 | 0,0  | 0,0  | 0,0  |
| GLYMA06G09650 | (1 of 4) PTHR31734:SF18 -<br>AUXIN-RESPONSIVE                         | 4 | 0,0 | -0,7 | 0,0  | 0,0 | 0,0 | 0,0  | 0,0  | 0,0  |
| GLYMA19G22460 | AMP-dependent synthetase and<br>ligase family protein                 | 4 | 0,0 | -0,8 | 0,0  | 0,0 | 0,0 | 0,0  | 0,0  | -0,5 |
| GLYMA16G06333 | ASB1, TRP4, WEI7, anthranilate<br>synthase beta subunit 1             | 4 | 0,0 | -0,8 | 0,0  | 0,0 | 0,0 | 0,0  | 0,0  | 0,0  |
| GLYMA18G30900 | (1 of 3) PTHR23130:SF95 -<br>AUXIN-RESPONSIVE                         | 4 | 0,0 | -2,0 | 0,0  | 0,0 | 0,0 | 0,0  | 0,0  | 0,0  |
| GLYMA13G07320 | Putative uncharacterized protein-<br>LOC100790426                     | 4 | 0,0 | 0,0  | -1,0 | 0,0 | 0,0 | 0,0  | 0,0  | 0,0  |
| GLYMA03G31970 | Uncharacterized protein-<br>LOC100820508                              | 4 | 0,0 | -0,8 | 0,0  | 0,0 | 0,0 | 0,0  | 0,0  | 0,0  |
| GLYMA02G16890 | Uncharacterized protein-<br>LOC100801817                              | 4 | 0,0 | -1,7 | 0,0  | 0,0 | 0,0 | 0,0  | 0,0  | 0,0  |
| GLYMA02G05530 | (1 of 4) PTHR31374:SF35 -<br>AUXIN-INDUCED PROTEIN-                   | 4 | 0,0 | 0,0  | -1,1 | 0,0 | 0,0 | 0,0  | 0,0  | 0,0  |

|                                                                                                             |                                                                     |   |     |     |      |      |     |      |      |      |      |
|-------------------------------------------------------------------------------------------------------------|---------------------------------------------------------------------|---|-----|-----|------|------|-----|------|------|------|------|
| GLYMA08G03141                                                                                               | (1 of 36)                                                           | 4 | 0,0 | 0,0 | 0,0  | 0,0  | 0,0 | 0,0  | 0,0  | 0,0  | -1,1 |
| PF02309//PF02362//PF06507 - AUX/IAA family (AUX_IAA) // B3 DNA binding domain (B3) // Auxin response factor |                                                                     |   |     |     |      |      |     |      |      |      |      |
| GLYMA04G33720                                                                                               | ATMYB94, ATMYBCP70, MYB94, myb domain protein 94                    | 4 | 0,0 | 0,0 | 0,0  | 0,0  | 0,0 | 0,0  | 0,0  | 0,0  | -1,2 |
| GLYMA11G20020                                                                                               | AMP-dependent synthetase and ligase family protein                  | 4 | 0,0 | 0,0 | 0,0  | -0,6 | 0,0 | 0,0  | 0,0  | 0,0  | 0,0  |
| GLYMA18G03270                                                                                               | AMT1, ASA1, JDL1, TRP5, WEI2, anthranilate synthase alpha subunit 1 | 4 | 0,0 | 0,0 | -0,6 | -0,7 | 0,0 | -1,1 | 0,0  | 0,0  | -1,0 |
| GLYMA01G43880                                                                                               | ATCHS, CHS, TT4, Chalcone and stilbene synthase family              | 7 | 0,0 | 0,0 | 0,0  | 0,0  | 0,0 | -4,0 | -3,6 | -4,1 |      |
| GLYMA07G04850                                                                                               | (1 of 252) PF02519 - Auxin responsive protein                       | 8 | 0,0 | 0,0 | 0,0  | 0,0  | 0,0 | 5,2  | 0,0  | 0,0  | 0,0  |
| GLYMA12G02570                                                                                               | Uncharacterized protein-LOC100777785                                | - | 0,0 | 0,0 | 0,0  | 0,0  | 0,0 | 0,0  | 0,0  | 0,0  | 0,0  |
| GLYMA01G06290                                                                                               | Uncharacterized protein-LOC100789273                                | - | 0,0 | 0,0 | 0,0  | 0,0  | 0,0 | 0,0  | 0,0  | 0,0  | 0,0  |
| GLYMA14G27900                                                                                               | Auxin efflux carrier component-PIN6B                                | - | 0,0 | 0,0 | 0,0  | 0,0  | 0,0 | 0,0  | 0,0  | 0,0  | 0,0  |
| GLYMA09G13500                                                                                               | Auxin efflux carrier component-I1L2C6                               | - | 0,0 | 0,0 | 0,0  | 0,0  | 0,0 | 0,0  | 0,0  | 0,0  | 0,0  |
| GLYMA13G00390                                                                                               | Auxin efflux carrier component-LOC100499638                         | - | 0,0 | 0,0 | 0,0  | 0,0  | 0,0 | 0,0  | 0,0  | 0,0  | 0,0  |
| GLYMA18G49080                                                                                               | Auxin efflux carrier component-LOC100779697                         | - | 0,0 | 0,0 | 0,0  | 0,0  | 0,0 | 0,0  | 0,0  | 0,0  | 0,0  |
| GLYMA11G10270                                                                                               | Uncharacterized protein-LOC100803097                                | - | 0,0 | 0,0 | 0,0  | 0,0  | 0,0 | 0,0  | 0,0  | 0,0  | 0,0  |
| GLYMA11G09470                                                                                               | Uncharacterized protein-LOC100792133                                | - | 0,0 | 0,0 | 0,0  | 0,0  | 0,0 | 0,0  | 0,0  | 0,0  | 0,0  |
| GLYMA12G02560                                                                                               | Uncharacterized protein-I1LPF2                                      | - | 0,0 | 0,0 | 0,0  | 0,0  | 0,0 | 0,0  | 0,0  | 0,0  | 0,0  |
| GLYMA18G00870                                                                                               | Uncharacterized protein-LOC100810179                                | - | 0,0 | 0,0 | 0,0  | 0,0  | 0,0 | 0,0  | 0,0  | 0,0  | 0,0  |
| GLYMA19G30900                                                                                               | Auxin efflux carrier component-LOC100802041                         | - | 0,0 | 0,0 | 0,0  | 0,0  | 0,0 | 0,0  | 0,0  | 0,0  | 0,0  |
| GLYMA07G35460                                                                                               | Uncharacterized protein-LOC100815995                                | - | 0,0 | 0,0 | 0,0  | 0,0  | 0,0 | 0,0  | 0,0  | 0,0  | 0,0  |
| GLYMA17G16870                                                                                               | Auxin efflux carrier component-LOC100789817                         | - | 0,0 | 0,0 | 0,0  | 0,0  | 0,0 | 0,0  | 0,0  | 0,0  | 0,0  |
| GLYMA17G06460                                                                                               | Auxin efflux carrier component-PIN2b                                | - | 0,0 | 0,0 | 0,0  | 0,0  | 0,0 | 0,0  | 0,0  | 0,0  | 0,0  |
| GLYMA09G06970                                                                                               | Auxin efflux carrier component-GLYMA_09G061800                      | - | 0,0 | 0,0 | 0,0  | 0,0  | 0,0 | 0,0  | 0,0  | 0,0  | 0,0  |
| GLYMA05G27270                                                                                               | Uncharacterized protein-LOC100815218                                | - | 0,0 | 0,0 | 0,0  | 0,0  | 0,0 | 0,0  | 0,0  | 0,0  | 0,0  |



|               |                                                   |   |     |     |     |     |     |     |     |     |
|---------------|---------------------------------------------------|---|-----|-----|-----|-----|-----|-----|-----|-----|
| GLYMA07G34190 | Auxin efflux carrier component-<br>LOC100785146   | - | 0,0 | 0,0 | 0,0 | 0,0 | 0,0 | 0,0 | 0,0 | 0,0 |
| GLYMA19G34730 | Uncharacterized protein-<br>LOC100804154          | - | 0,0 | 0,0 | 0,0 | 0,0 | 0,0 | 0,0 | 0,0 | 0,0 |
| GLYMA18G47630 | Auxin efflux carrier component-<br>LOC100784879   | - | 0,0 | 0,0 | 0,0 | 0,0 | 0,0 | 0,0 | 0,0 | 0,0 |
| GLYMA02G12370 | Uncharacterized protein-I1JE79                    | - | 0,0 | 0,0 | 0,0 | 0,0 | 0,0 | 0,0 | 0,0 | 0,0 |
| GLYMA08G05900 | Auxin efflux carrier component-                   | - | 0,0 | 0,0 | 0,0 | 0,0 | 0,0 | 0,0 | 0,0 | 0,0 |
| GLYMA13G18440 | Uncharacterized protein-<br>LOC100814176          | - | 0,0 | 0,0 | 0,0 | 0,0 | 0,0 | 0,0 | 0,0 | 0,0 |
| GLYMA11G36960 | Uncharacterized protein-<br>LOC100795488          | - | 0,0 | 0,0 | 0,0 | 0,0 | 0,0 | 0,0 | 0,0 | 0,0 |
| GLYMA05G23180 | Auxin efflux carrier component-<br>PIN11A         | - | 0,0 | 0,0 | 0,0 | 0,0 | 0,0 | 0,0 | 0,0 | 0,0 |
| GLYMA03G28130 | Auxin efflux carrier component-<br>PIN10B         | - | 0,0 | 0,0 | 0,0 | 0,0 | 0,0 | 0,0 | 0,0 | 0,0 |
| GLYMA15G25690 | Auxin efflux carrier component-<br>LOC100781239   | - | 0,0 | 0,0 | 0,0 | 0,0 | 0,0 | 0,0 | 0,0 | 0,0 |
| GLYMA01G35960 | Uncharacterized protein-<br>LOC100783059          | - | 0,0 | 0,0 | 0,0 | 0,0 | 0,0 | 0,0 | 0,0 | 0,0 |
| GLYMA01G35970 | Uncharacterized protein-<br>LOC100779470          | - | 0,0 | 0,0 | 0,0 | 0,0 | 0,0 | 0,0 | 0,0 | 0,0 |
| GLYMA15G18241 | Uncharacterized protein-<br>GLYMA_15G168100       | - | 0,0 | 0,0 | 0,0 | 0,0 | 0,0 | 0,0 | 0,0 | 0,0 |
| GLYMA20G01391 | Uncharacterized protein-K7N0P2                    | - | 0,0 | 0,0 | 0,0 | 0,0 | 0,0 | 0,0 | 0,0 | 0,0 |
| GLYMA11G10260 | Uncharacterized protein-<br>LOC100802572          | - | 0,0 | 0,0 | 0,0 | 0,0 | 0,0 | 0,0 | 0,0 | 0,0 |
| GLYMA11G09461 | Uncharacterized protein-<br>GLYMA_11G089200       | - | 0,0 | 0,0 | 0,0 | 0,0 | 0,0 | 0,0 | 0,0 | 0,0 |
| GLYMA06G41072 | Uncharacterized protein-<br>GLYMA_06G262200       | - | 0,0 | 0,0 | 0,0 | 0,0 | 0,0 | 0,0 | 0,0 | 0,0 |
| GLYMA07G11550 | Auxin efflux carrier component-<br>PIN4a          | - | 0,0 | 0,0 | 0,0 | 0,0 | 0,0 | 0,0 | 0,0 | 0,0 |
| GLYMA13G09043 | Uncharacterized protein-<br>LOC100818269          | - | 0,0 | 0,0 | 0,0 | 0,0 | 0,0 | 0,0 | 0,0 | 0,0 |
| GLYMA13G09026 | Uncharacterized protein-<br>GLYMA_13G038400       | - | 0,0 | 0,0 | 0,0 | 0,0 | 0,0 | 0,0 | 0,0 | 0,0 |
| GLYMA05G28050 | Uncharacterized protein-<br>LOC100800464          | - | 0,0 | 0,0 | 0,0 | 0,0 | 0,0 | 0,0 | 0,0 | 0,0 |
| GLYMA13G07280 | Uncharacterized protein-<br>LOC100787244          | - | 0,0 | 0,0 | 0,0 | 0,0 | 0,0 | 0,0 | 0,0 | 0,0 |
| GLYMA09G38700 | Auxin efflux carrier component-<br>LOC100788225   | - | 0,0 | 0,0 | 0,0 | 0,0 | 0,0 | 0,0 | 0,0 | 0,0 |
| GLYMA09G37561 | Auxin efflux carrier component-<br>LOC100801456   | - | 0,0 | 0,0 | 0,0 | 0,0 | 0,0 | 0,0 | 0,0 | 0,0 |
| GLYMA06G45520 | ATMYB14, MYB14, MYB14AT,<br>myb domain protein 14 | - | 0,0 | 0,0 | 0,0 | 0,0 | 0,0 | 0,0 | 0,0 | 0,0 |

|               |                                                                                |   |     |     |     |     |     |     |     |     |
|---------------|--------------------------------------------------------------------------------|---|-----|-----|-----|-----|-----|-----|-----|-----|
| GLYMA10G06610 | ATEIN2, CKR1, EIN2, ERA3, ORE2, ORE3, PIR2, NRAMP metal ion transporter family | - | 0,0 | 0,0 | 0,0 | 0,0 | 0,0 | 0,0 | 0,0 | 0,0 |
| GLYMA13G09010 | ATMIXTA, ATMYB16, MYB16, myb domain protein 16                                 | - | 0,0 | 0,0 | 0,0 | 0,0 | 0,0 | 0,0 | 0,0 | 0,0 |
| GLYMA08G09750 | BRL2, VH1, BRI1-like 2                                                         | - | 0,0 | 0,0 | 0,0 | 0,0 | 0,0 | 0,0 | 0,0 | 0,0 |
| GLYMA04G07940 | AJH2, CSN5, CSN5B, COP9-signalosome 5B                                         | - | 0,0 | 0,0 | 0,0 | 0,0 | 0,0 | 0,0 | 0,0 | 0,0 |
| GLYMA10G26860 | IAA33, indole-3-acetic acid inducible 33                                       | - | 0,0 | 0,0 | 0,0 | 0,0 | 0,0 | 0,0 | 0,0 | 0,0 |
| GLYMA10G00291 | AXR5, IAA1, indole-3-acetic acid inducible                                     | - | 0,0 | 0,0 | 0,0 | 0,0 | 0,0 | 0,0 | 0,0 | 0,0 |
| GLYMA16G09760 | AIR12, auxin-responsive family protein                                         | - | 0,0 | 0,0 | 0,0 | 0,0 | 0,0 | 0,0 | 0,0 | 0,0 |
| GLYMA18G49177 | MIF1, mini zinc finger 1                                                       | - | 0,0 | 0,0 | 0,0 | 0,0 | 0,0 | 0,0 | 0,0 | 0,0 |
| GLYMA01G36190 | Auxin efflux carrier family protein                                            | - | 0,0 | 0,0 | 0,0 | 0,0 | 0,0 | 0,0 | 0,0 | 0,0 |
| GLYMA10G29110 | PDLZ2, PLDP2, PLDZETA2, phospholipase D P2                                     | - | 0,0 | 0,0 | 0,0 | 0,0 | 0,0 | 0,0 | 0,0 | 0,0 |
| GLYMA08G04310 | YUC2, Flavin-binding monooxygenase family protein                              | - | 0,0 | 0,0 | 0,0 | 0,0 | 0,0 | 0,0 | 0,0 | 0,0 |
| GLYMA19G42320 | AXR4, RGR, RGR1, alpha/beta-Hydrolases superfamily protein                     | - | 0,0 | 0,0 | 0,0 | 0,0 | 0,0 | 0,0 | 0,0 | 0,0 |
| GLYMA17G11705 | ATAVP3, AtVHP1;1, AVP-3, AVP1, Inorganic H pyrophosphatase family protein      | - | 0,0 | 0,0 | 0,0 | 0,0 | 0,0 | 0,0 | 0,0 | 0,0 |
| GLYMA06G10840 | AtMYB93, MYB93, myb domain protein 93                                          | - | 0,0 | 0,0 | 0,0 | 0,0 | 0,0 | 0,0 | 0,0 | 0,0 |
| GLYMA06G09100 | ATHB-8, ATHB8, HB-8, homeobox gene 8                                           | - | 0,0 | 0,0 | 0,0 | 0,0 | 0,0 | 0,0 | 0,0 | 0,0 |
| GLYMA17G13270 | TGH, SWAP (Suppressor-of-White-APricot)/surp domain-containing protein         | - | 0,0 | 0,0 | 0,0 | 0,0 | 0,0 | 0,0 | 0,0 | 0,0 |
| GLYMA18G42790 | ATCPL2, CPL2, carboxyl-terminal domain (ctd)                                   | - | 0,0 | 0,0 | 0,0 | 0,0 | 0,0 | 0,0 | 0,0 | 0,0 |
| GLYMA15G23205 | Auxin-responsive GH3 family protein                                            | - | 0,0 | 0,0 | 0,0 | 0,0 | 0,0 | 0,0 | 0,0 | 0,0 |
| GLYMA17G35620 | ATMYB44, ATMYBR1, MYB44, MYBR1, myb domain protein r1                          | - | 0,0 | 0,0 | 0,0 | 0,0 | 0,0 | 0,0 | 0,0 | 0,0 |
| GLYMA02G42030 | AtMYB109, MYB109, myb domain protein 109                                       | - | 0,0 | 0,0 | 0,0 | 0,0 | 0,0 | 0,0 | 0,0 | 0,0 |
| GLYMA11G06830 | RCE1, RUB1 conjugating                                                         | - | 0,0 | 0,0 | 0,0 | 0,0 | 0,0 | 0,0 | 0,0 | 0,0 |
| GLYMA01G40090 | ATBT4, BT4, BTB and TAZ domain protein 4                                       | - | 0,0 | 0,0 | 0,0 | 0,0 | 0,0 | 0,0 | 0,0 | 0,0 |
| GLYMA08G11730 | NOV, Histidine kinase-, DNA gyrase B-, and HSP90-like ATPase family protein    | - | 0,0 | 0,0 | 0,0 | 0,0 | 0,0 | 0,0 | 0,0 | 0,0 |

|               |                                                                                     |   |     |     |     |     |     |     |     |     |     |
|---------------|-------------------------------------------------------------------------------------|---|-----|-----|-----|-----|-----|-----|-----|-----|-----|
| GLYMA11G02390 | ACS6, ATACS6, 1-aminocyclopropane-1-carboxylic acid (acc) synthase 6                | - | 0,0 | 0,0 | 0,0 | 0,0 | 0,0 | 0,0 | 0,0 | 0,0 | 0,0 |
| GLYMA14G40530 | SAUR-like auxin-responsive protein family                                           | - | 0,0 | 0,0 | 0,0 | 0,0 | 0,0 | 0,0 | 0,0 | 0,0 | 0,0 |
| GLYMA17G02800 | ATCUL1, AXR6, CUL1, cullin 1                                                        | - | 0,0 | 0,0 | 0,0 | 0,0 | 0,0 | 0,0 | 0,0 | 0,0 | 0,0 |
| GLYMA20G20900 | SMAP1, small acidic protein 1                                                       | - | 0,0 | 0,0 | 0,0 | 0,0 | 0,0 | 0,0 | 0,0 | 0,0 | 0,0 |
| GLYMA11G33831 | DRB1, HYL1, dsRNA-binding domain-like superfamily protein                           | - | 0,0 | 0,0 | 0,0 | 0,0 | 0,0 | 0,0 | 0,0 | 0,0 | 0,0 |
| GLYMA20G37660 | AMI1, ATAMI1, ATTOC64-I, TOC64-I, amidase 1                                         | - | 0,0 | 0,0 | 0,0 | 0,0 | 0,0 | 0,0 | 0,0 | 0,0 | 0,0 |
| GLYMA11G07710 | SRS1, STY1, Lateral root primordium (LRP) protein-related                           | - | 0,0 | 0,0 | 0,0 | 0,0 | 0,0 | 0,0 | 0,0 | 0,0 | 0,0 |
| GLYMA17G00570 | ATCAND1, CAND1, ETA2, HVE, TIP120, cullin-associated and neddylation dissociated    | - | 0,0 | 0,0 | 0,0 | 0,0 | 0,0 | 0,0 | 0,0 | 0,0 | 0,0 |
| GLYMA17G03863 | ABCG37, ATPDR9, PDR9, PIS1, pleiotropic drug resistance                             | - | 0,0 | 0,0 | 0,0 | 0,0 | 0,0 | 0,0 | 0,0 | 0,0 | 0,0 |
| GLYMA08G23430 | COP3, HLS1, UNS2, Acyl-CoA N-acyltransferases (NAT) superfamily protein             | - | 0,0 | 0,0 | 0,0 | 0,0 | 0,0 | 0,0 | 0,0 | 0,0 | 0,0 |
| GLYMA08G38800 | DRN-LIKE, DRNL, ESR2, SOB2, DORNROSCHEN-like                                        | - | 0,0 | 0,0 | 0,0 | 0,0 | 0,0 | 0,0 | 0,0 | 0,0 | 0,0 |
| GLYMA20G03920 | VIK, VH1-interacting kinase                                                         | - | 0,0 | 0,0 | 0,0 | 0,0 | 0,0 | 0,0 | 0,0 | 0,0 | 0,0 |
| GLYMA19G43450 | IAA16, indoleacetic acid-induced protein 16                                         | - | 0,0 | 0,0 | 0,0 | 0,0 | 0,0 | 0,0 | 0,0 | 0,0 | 0,0 |
| GLYMA12G09290 | AIR3, Subtilisin-like serine endopeptidase family protein                           | - | 0,0 | 0,0 | 0,0 | 0,0 | 0,0 | 0,0 | 0,0 | 0,0 | 0,0 |
| GLYMA03G38370 | IAA20, indole-3-acetic acid inducible 20                                            | - | 0,0 | 0,0 | 0,0 | 0,0 | 0,0 | 0,0 | 0,0 | 0,0 | 0,0 |
| GLYMA14G40540 | ARF5, IAA24, MP, Transcriptional factor B3 family protein / auxin-responsive factor | - | 0,0 | 0,0 | 0,0 | 0,0 | 0,0 | 0,0 | 0,0 | 0,0 | 0,0 |
| GLYMA02G41730 | EMB30, GN, VAN7, sec7 domain-containing protein                                     | - | 0,0 | 0,0 | 0,0 | 0,0 | 0,0 | 0,0 | 0,0 | 0,0 | 0,0 |
| GLYMA20G04761 | LEC2, AP2/B3-like transcriptional factor family protein                             | - | 0,0 | 0,0 | 0,0 | 0,0 | 0,0 | 0,0 | 0,0 | 0,0 | 0,0 |
| GLYMA14G11260 | SLOMO, F-box family protein                                                         | - | 0,0 | 0,0 | 0,0 | 0,0 | 0,0 | 0,0 | 0,0 | 0,0 | 0,0 |
| GLYMA09G29720 | AGO1, Stabilizer of iron transporter SufD /                                         | - | 0,0 | 0,0 | 0,0 | 0,0 | 0,0 | 0,0 | 0,0 | 0,0 | 0,0 |
| GLYMA20G20180 | YUC3, YUCCA 3                                                                       | - | 0,0 | 0,0 | 0,0 | 0,0 | 0,0 | 0,0 | 0,0 | 0,0 | 0,0 |
| GLYMA03G09140 | AUX1, MAP1, PIR1, WAV5, Transmembrane amino acid transporter family protein         | - | 0,0 | 0,0 | 0,0 | 0,0 | 0,0 | 0,0 | 0,0 | 0,0 | 0,0 |

|               |                                                                                                |   |     |     |     |     |     |     |     |     |
|---------------|------------------------------------------------------------------------------------------------|---|-----|-----|-----|-----|-----|-----|-----|-----|
| GLYMA13G22750 | BDL, IAA12, AUX/IAA<br>transcriptional regulator family                                        | - | 0,0 | 0,0 | 0,0 | 0,0 | 0,0 | 0,0 | 0,0 | 0,0 |
| GLYMA15G40340 | PK3AT, WAG1, WAG 1                                                                             | - | 0,0 | 0,0 | 0,0 | 0,0 | 0,0 | 0,0 | 0,0 | 0,0 |
| GLYMA11G05070 | ATTBP3, ATTRB2, TBP3,<br>TRB2, Homeodomain-<br>like/winged-helix DNA-binding<br>family protein | - | 0,0 | 0,0 | 0,0 | 0,0 | 0,0 | 0,0 | 0,0 | 0,0 |
| GLYMA02G03020 | myb-like transcription factor<br>family protein                                                | - | 0,0 | 0,0 | 0,0 | 0,0 | 0,0 | 0,0 | 0,0 | 0,0 |
| GLYMA11G06911 | APP1, ATAPP1,<br>aminopeptidase P1                                                             | - | 0,0 | 0,0 | 0,0 | 0,0 | 0,0 | 0,0 | 0,0 | 0,0 |
| GLYMA17G06690 | PRHA, pathogenesis related<br>homeodomain protein A                                            | - | 0,0 | 0,0 | 0,0 | 0,0 | 0,0 | 0,0 | 0,0 | 0,0 |
| GLYMA02G36220 | ATSNX1, SNX1, sorting nexin 1                                                                  | - | 0,0 | 0,0 | 0,0 | 0,0 | 0,0 | 0,0 | 0,0 | 0,0 |
| GLYMA06G05520 | CYP711A1, MAX1, cytochrome<br>P450, family 711, subfamily A,<br>polypeptide 1                  | - | 0,0 | 0,0 | 0,0 | 0,0 | 0,0 | 0,0 | 0,0 | 0,0 |
| GLYMA18G13373 | SAUR-like auxin-responsive<br>protein family                                                   | - | 0,0 | 0,0 | 0,0 | 0,0 | 0,0 | 0,0 | 0,0 | 0,0 |
| GLYMA02G38410 | ATMES17, MES17, methyl<br>esterase 17                                                          | - | 0,0 | 0,0 | 0,0 | 0,0 | 0,0 | 0,0 | 0,0 | 0,0 |
| GLYMA01G33420 | SAUR-like auxin-responsive<br>protein family                                                   | - | 0,0 | 0,0 | 0,0 | 0,0 | 0,0 | 0,0 | 0,0 | 0,0 |
| GLYMA01G24100 | IAA9, indole-3-acetic acid                                                                     | - | 0,0 | 0,0 | 0,0 | 0,0 | 0,0 | 0,0 | 0,0 | 0,0 |
| GLYMA05G21680 | AUR3, BRU6, GH3-2, GH3.2,<br>YDK1, Auxin-responsive GH3                                        | - | 0,0 | 0,0 | 0,0 | 0,0 | 0,0 | 0,0 | 0,0 | 0,0 |
| GLYMA07G40270 | ARF1, auxin response factor 1                                                                  | - | 0,0 | 0,0 | 0,0 | 0,0 | 0,0 | 0,0 | 0,0 | 0,0 |
| GLYMA03G03640 | ATR4, CYP83B1, RED1, RNT1,<br>SUR2, cytochrome P450, family<br>83, subfamily B, polypeptide 1  | - | 0,0 | 0,0 | 0,0 | 0,0 | 0,0 | 0,0 | 0,0 | 0,0 |
| GLYMA05G38550 | AGD3, SFC, VAN3, ARF<br>GTPase-activating protein                                              | - | 0,0 | 0,0 | 0,0 | 0,0 | 0,0 | 0,0 | 0,0 | 0,0 |
| GLYMA11G08070 | SAUR-like auxin-responsive<br>protein family                                                   | - | 0,0 | 0,0 | 0,0 | 0,0 | 0,0 | 0,0 | 0,0 | 0,0 |
| GLYMA04G39380 | ACT7, actin 7                                                                                  | - | 0,0 | 0,0 | 0,0 | 0,0 | 0,0 | 0,0 | 0,0 | 0,0 |
| GLYMA17G00295 | 5PTASE13, AT5PTASE13,<br>Endonuclease/exonuclease/pho<br>sphatase family protein               | - | 0,0 | 0,0 | 0,0 | 0,0 | 0,0 | 0,0 | 0,0 | 0,0 |
| GLYMA01G39780 | GH3.1, Auxin-responsive GH3<br>family protein                                                  | - | 0,0 | 0,0 | 0,0 | 0,0 | 0,0 | 0,0 | 0,0 | 0,0 |
| GLYMA01G05440 | PNC1, peroxisomal adenine<br>nucleotide carrier 1                                              | - | 0,0 | 0,0 | 0,0 | 0,0 | 0,0 | 0,0 | 0,0 | 0,0 |
| GLYMA01G37215 | SAUR-like auxin-responsive<br>protein family                                                   | - | 0,0 | 0,0 | 0,0 | 0,0 | 0,0 | 0,0 | 0,0 | 0,0 |

|               |                                                                                                    |   |     |     |     |     |     |     |     |     |
|---------------|----------------------------------------------------------------------------------------------------|---|-----|-----|-----|-----|-----|-----|-----|-----|
| GLYMA06G37381 | ABCG36, ATABCG36, ATPDR8, PDR8, PEN3, ABC-2 and Plant PDR ABC-type transporter family protein      | - | 0,0 | 0,0 | 0,0 | 0,0 | 0,0 | 0,0 | 0,0 | 0,0 |
| GLYMA14G03900 | LRP1, Lateral root primordium (LRP) protein-related                                                | - | 0,0 | 0,0 | 0,0 | 0,0 | 0,0 | 0,0 | 0,0 | 0,0 |
| GLYMA08G24090 | SAUR-like auxin-responsive protein family                                                          | - | 0,0 | 0,0 | 0,0 | 0,0 | 0,0 | 0,0 | 0,0 | 0,0 |
| GLYMA14G19670 | SAUR-like auxin-responsive protein family                                                          | - | 0,0 | 0,0 | 0,0 | 0,0 | 0,0 | 0,0 | 0,0 | 0,0 |
| GLYMA13G05300 | ABCB19, ATABCB19, ATMDR1, ATMDR11, ATPGP19, MDR1, MDR11, PGP19, ATP binding cassette subfamily B19 | - | 0,0 | 0,0 | 0,0 | 0,0 | 0,0 | 0,0 | 0,0 | 0,0 |
| GLYMA09G40760 | Auxin efflux carrier family protein                                                                | - | 0,0 | 0,0 | 0,0 | 0,0 | 0,0 | 0,0 | 0,0 | 0,0 |
| GLYMA03G35500 | SAUR-like auxin-responsive protein family                                                          | - | 0,0 | 0,0 | 0,0 | 0,0 | 0,0 | 0,0 | 0,0 | 0,0 |
| GLYMA19G27336 | FUS3, AP2/B3-like transcriptional factor family protein                                            | - | 0,0 | 0,0 | 0,0 | 0,0 | 0,0 | 0,0 | 0,0 | 0,0 |
| GLYMA14G33381 | ATNDPK2, NDPK IA, NDPK IA IA, NDPK1A, NDPK2, nucleoside diphosphate kinase 2                       | - | 0,0 | 0,0 | 0,0 | 0,0 | 0,0 | 0,0 | 0,0 | 0,0 |
| GLYMA09G01501 | ADA2B, PRZ1, homolog of yeast ADA2 2B                                                              | - | 0,0 | 0,0 | 0,0 | 0,0 | 0,0 | 0,0 | 0,0 | 0,0 |
| GLYMA01G36880 | ARAC1, ATGP2, ATRAC1, ATROP3, ROP3, Arabidopsis RAC-like 1                                         | - | 0,0 | 0,0 | 0,0 | 0,0 | 0,0 | 0,0 | 0,0 | 0,0 |
| GLYMA17G05093 | SAUR-like auxin-responsive protein family                                                          | - | 0,0 | 0,0 | 0,0 | 0,0 | 0,0 | 0,0 | 0,0 | 0,0 |
| GLYMA16G23590 | ATMCB1, MBP1, MCB1, RPN10, regulatory particle non-ATPase 10                                       | - | 0,0 | 0,0 | 0,0 | 0,0 | 0,0 | 0,0 | 0,0 | 0,0 |
| GLYMA13G17750 | IAA31, indole-3-acetic acid inducible 31                                                           | - | 0,0 | 0,0 | 0,0 | 0,0 | 0,0 | 0,0 | 0,0 | 0,0 |
| GLYMA06G45640 | DFL1, GH3.6, Auxin-responsive GH3 family protein                                                   | - | 0,0 | 0,0 | 0,0 | 0,0 | 0,0 | 0,0 | 0,0 | 0,0 |
| GLYMA18G51450 | CDC27b, HBT, CDC27 family protein                                                                  | - | 0,0 | 0,0 | 0,0 | 0,0 | 0,0 | 0,0 | 0,0 | 0,0 |
| GLYMA19G44310 | FIN219, JAR1, Auxin-responsive GH3 family protein                                                  | - | 0,0 | 0,0 | 0,0 | 0,0 | 0,0 | 0,0 | 0,0 | 0,0 |
| GLYMA07G15850 | AS1, ATMYB91, ATPHAN, MYB91, myb-like HTH transcriptional regulator family                         | - | 0,0 | 0,0 | 0,0 | 0,0 | 0,0 | 0,0 | 0,0 | 0,0 |

|               |                                                                                |   |     |     |     |     |     |     |     |     |
|---------------|--------------------------------------------------------------------------------|---|-----|-----|-----|-----|-----|-----|-----|-----|
| GLYMA02G06970 | OBP1, OBF binding protein 1                                                    | - | 0,0 | 0,0 | 0,0 | 0,0 | 0,0 | 0,0 | 0,0 | 0,0 |
| GLYMA10G39440 | ACL5, S-adenosyl-L-methionine-dependent methyltransferases superfamily protein | - | 0,0 | 0,0 | 0,0 | 0,0 | 0,0 | 0,0 | 0,0 | 0,0 |
| GLYMA04G00830 | SAUR-like auxin-responsive protein family                                      | - | 0,0 | 0,0 | 0,0 | 0,0 | 0,0 | 0,0 | 0,0 | 0,0 |
| GLYMA06G46210 | AXR1, NAD(P)-binding Rossmann-fold superfamily                                 | - | 0,0 | 0,0 | 0,0 | 0,0 | 0,0 | 0,0 | 0,0 | 0,0 |
| GLYMA04G00870 | SAUR-like auxin-responsive protein family                                      | - | 0,0 | 0,0 | 0,0 | 0,0 | 0,0 | 0,0 | 0,0 | 0,0 |
| GLYMA05G36360 | SAUR-like auxin-responsive protein family                                      | - | 0,0 | 0,0 | 0,0 | 0,0 | 0,0 | 0,0 | 0,0 | 0,0 |
| GLYMA09G35630 | SAUR-like auxin-responsive protein family                                      | - | 0,0 | 0,0 | 0,0 | 0,0 | 0,0 | 0,0 | 0,0 | 0,0 |
| GLYMA13G35950 | PBP1, pinoid-binding protein 1                                                 | - | 0,0 | 0,0 | 0,0 | 0,0 | 0,0 | 0,0 | 0,0 | 0,0 |
| GLYMA14G00880 | MOS3, NUP96, PRE, SAR3, SUPPRESSOR OF AUXIN RESISTANCE 3                       | - | 0,0 | 0,0 | 0,0 | 0,0 | 0,0 | 0,0 | 0,0 | 0,0 |
| GLYMA05G32993 | SAUR-like auxin-responsive protein family                                      | - | 0,0 | 0,0 | 0,0 | 0,0 | 0,0 | 0,0 | 0,0 | 0,0 |
| GLYMA12G11890 | DFL2, GH3-10, Auxin-responsive GH3 family protein                              | - | 0,0 | 0,0 | 0,0 | 0,0 | 0,0 | 0,0 | 0,0 | 0,0 |
| GLYMA14G20670 | YUC6, Flavin-binding monooxygenase family protein                              | - | 0,0 | 0,0 | 0,0 | 0,0 | 0,0 | 0,0 | 0,0 | 0,0 |
| GLYMA10G40360 | RSL2, ROOT HAIR DEFECTIVE 6-LIKE 2                                             | - | 0,0 | 0,0 | 0,0 | 0,0 | 0,0 | 0,0 | 0,0 | 0,0 |
| GLYMA11G16061 | AJH1, CSN5A, JAB1, COP9 signalosome 5A                                         | - | 0,0 | 0,0 | 0,0 | 0,0 | 0,0 | 0,0 | 0,0 | 0,0 |
| GLYMA08G18600 | WAG2, Protein kinase superfamily protein                                       | - | 0,0 | 0,0 | 0,0 | 0,0 | 0,0 | 0,0 | 0,0 | 0,0 |
| GLYMA18G51061 | ASA1, BIG, CRM1, DOC1, LPR1, TIR3, UMB1, auxin transport protein (BIG)         | - | 0,0 | 0,0 | 0,0 | 0,0 | 0,0 | 0,0 | 0,0 | 0,0 |
| GLYMA12G33770 | TTL3, VIT, tetratricopeptide-repeat thioredoxin-like 3                         | - | 0,0 | 0,0 | 0,0 | 0,0 | 0,0 | 0,0 | 0,0 | 0,0 |
| GLYMA07G08130 | SAUR-like auxin-responsive protein family                                      | - | 0,0 | 0,0 | 0,0 | 0,0 | 0,0 | 0,0 | 0,0 | 0,0 |
| GLYMA03G34031 | SAUR-like auxin-responsive protein family                                      | - | 0,0 | 0,0 | 0,0 | 0,0 | 0,0 | 0,0 | 0,0 | 0,0 |
| GLYMA19G02600 | ATMYB30, MYB30, myb domain protein 30                                          | - | 0,0 | 0,0 | 0,0 | 0,0 | 0,0 | 0,0 | 0,0 | 0,0 |
| GLYMA06G19960 | Homeodomain-like superfamily protein                                           | - | 0,0 | 0,0 | 0,0 | 0,0 | 0,0 | 0,0 | 0,0 | 0,0 |
| GLYMA15G02250 | Homeodomain-like superfamily protein                                           | - | 0,0 | 0,0 | 0,0 | 0,0 | 0,0 | 0,0 | 0,0 | 0,0 |

|               |                                                                                                                      |   |     |     |     |     |     |     |     |
|---------------|----------------------------------------------------------------------------------------------------------------------|---|-----|-----|-----|-----|-----|-----|-----|
| GLYMA14G35690 | ATPURC, PUR7, PURC, purin 7                                                                                          | - | 0,0 | 0,0 | 0,0 | 0,0 | 0,0 | 0,0 | 0,0 |
| GLYMA07G07200 | Homeodomain-like superfamily protein                                                                                 | - | 0,0 | 0,0 | 0,0 | 0,0 | 0,0 | 0,0 | 0,0 |
| GLYMA03G42260 | LHY, LHY1, Homeodomain-like superfamily protein                                                                      | - | 0,0 | 0,0 | 0,0 | 0,0 | 0,0 | 0,0 | 0,0 |
| GLYMA09G10280 | AIR9, Outer arm dynein light chain 1 protein                                                                         | - | 0,0 | 0,0 | 0,0 | 0,0 | 0,0 | 0,0 | 0,0 |
| GLYMA01G14266 | ATCCD7, CCD7, MAX3, carotenoid cleavage                                                                              | - | 0,0 | 0,0 | 0,0 | 0,0 | 0,0 | 0,0 | 0,0 |
| GLYMA01G43150 | ATSGT1B, EDM1, ETA3, RPR1, SGT1B, phosphatase-related                                                                | - | 0,0 | 0,0 | 0,0 | 0,0 | 0,0 | 0,0 | 0,0 |
| GLYMA01G17300 | SAUR-like auxin-responsive protein family                                                                            | - | 0,0 | 0,0 | 0,0 | 0,0 | 0,0 | 0,0 | 0,0 |
| GLYMA07G04845 | SAUR-like auxin-responsive protein family                                                                            | - | 0,0 | 0,0 | 0,0 | 0,0 | 0,0 | 0,0 | 0,0 |
| GLYMA09G19320 | Auxin efflux carrier family protein                                                                                  | - | 0,0 | 0,0 | 0,0 | 0,0 | 0,0 | 0,0 | 0,0 |
| GLYMA12G17680 | FQR1, flavodoxin-like quinone reductase 1                                                                            | - | 0,0 | 0,0 | 0,0 | 0,0 | 0,0 | 0,0 | 0,0 |
| GLYMA04G38180 | SAUR-like auxin-responsive protein family                                                                            | - | 0,0 | 0,0 | 0,0 | 0,0 | 0,0 | 0,0 | 0,0 |
| GLYMA14G15820 | YUC4, Flavin-binding monooxygenase family protein                                                                    | - | 0,0 | 0,0 | 0,0 | 0,0 | 0,0 | 0,0 | 0,0 |
| GLYMA15G00490 | HCT, hydroxycinnamoyl-CoA shikimate/quininate hydroxycinnamoyl transferase                                           | - | 0,0 | 0,0 | 0,0 | 0,0 | 0,0 | 0,0 | 0,0 |
| GLYMA04G12981 | ATPEX5, PEX5, peroxin 5                                                                                              | - | 0,0 | 0,0 | 0,0 | 0,0 | 0,0 | 0,0 | 0,0 |
| GLYMA03G42080 | SAUR-like auxin-responsive protein family                                                                            | - | 0,0 | 0,0 | 0,0 | 0,0 | 0,0 | 0,0 | 0,0 |
| GLYMA17G05220 | ARF7, BIP, IAA21, IAA23, IAA25, MSG1, NPH4, TIR5, Transcriptional factor B3 family protein / auxin-responsive factor | - | 0,0 | 0,0 | 0,0 | 0,0 | 0,0 | 0,0 | 0,0 |
| GLYMA11G07730 | WAT1, Walls Are Thin 1                                                                                               | - | 0,0 | 0,0 | 0,0 | 0,0 | 0,0 | 0,0 | 0,0 |
| GLYMA06G03270 | ATMPK1, MPK1, mitogen-activated protein kinase 1                                                                     | - | 0,0 | 0,0 | 0,0 | 0,0 | 0,0 | 0,0 | 0,0 |
| GLYMA08G12180 | AAE18, acyl-activating enzyme 18                                                                                     | - | 0,0 | 0,0 | 0,0 | 0,0 | 0,0 | 0,0 | 0,0 |
| GLYMA10G27881 | IAA30, indole-3-acetic acid inducible 30                                                                             | - | 0,0 | 0,0 | 0,0 | 0,0 | 0,0 | 0,0 | 0,0 |
| GLYMA04G43350 | ARF17, auxin response factor 17                                                                                      | - | 0,0 | 0,0 | 0,0 | 0,0 | 0,0 | 0,0 | 0,0 |

|               |                                                                                             |   |     |     |     |     |     |     |     |
|---------------|---------------------------------------------------------------------------------------------|---|-----|-----|-----|-----|-----|-----|-----|
| GLYMA07G03180 | TPL, WSIP1, Transducin family protein / WD-40 repeat family                                 | - | 0,0 | 0,0 | 0,0 | 0,0 | 0,0 | 0,0 | 0,0 |
| GLYMA08G17880 | SAUR-like auxin-responsive protein family                                                   | - | 0,0 | 0,0 | 0,0 | 0,0 | 0,0 | 0,0 | 0,0 |
| GLYMA02G10280 | ATGGT-IB, GGB, PGGT-I, Prenyltransferase family protein                                     | - | 0,0 | 0,0 | 0,0 | 0,0 | 0,0 | 0,0 | 0,0 |
| GLYMA15G41230 | ATRUB1, NEDD8, RUB1, related to ubiquitin 1                                                 | - | 0,0 | 0,0 | 0,0 | 0,0 | 0,0 | 0,0 | 0,0 |
| GLYMA08G41260 | ANAC009, FEZ, NAC (No Apical Meristem) domain transcriptional regulator superfamily protein | - | 0,0 | 0,0 | 0,0 | 0,0 | 0,0 | 0,0 | 0,0 |
| GLYMA18G49490 | AAR3, Domain of unknown function (DUF298)                                                   | - | 0,0 | 0,0 | 0,0 | 0,0 | 0,0 | 0,0 | 0,0 |
| GLYMA19G41250 | ATMYB61, MYB61, myb domain protein 61                                                       | - | 0,0 | 0,0 | 0,0 | 0,0 | 0,0 | 0,0 | 0,0 |
| GLYMA13G24240 | ARF3, ETT, Transcriptional factor B3 family protein / auxin-responsive factor AUX/IAA-      | - | 0,0 | 0,0 | 0,0 | 0,0 | 0,0 | 0,0 | 0,0 |
| GLYMA08G47240 | ABI3, SIS10, AP2/B3-like transcriptional factor family protein                              | - | 0,0 | 0,0 | 0,0 | 0,0 | 0,0 | 0,0 | 0,0 |
| GLYMA15G15910 | TCTP, translationally controlled tumor protein                                              | - | 0,0 | 0,0 | 0,0 | 0,0 | 0,0 | 0,0 | 0,0 |
| GLYMA05G04240 | SAUR-like auxin-responsive protein family                                                   | - | 0,0 | 0,0 | 0,0 | 0,0 | 0,0 | 0,0 | 0,0 |
| GLYMA05G07980 | Duplicated homeodomain-like superfamily protein                                             | - | 0,0 | 0,0 | 0,0 | 0,0 | 0,0 | 0,0 | 0,0 |
| GLYMA03G30590 | GDG1, GH3.12, PBS3, WIN3, Auxin-responsive GH3 family protein                               | - | 0,0 | 0,0 | 0,0 | 0,0 | 0,0 | 0,0 | 0,0 |
| GLYMA18G49290 | ATHB20, HB20, homeobox protein 20                                                           | - | 0,0 | 0,0 | 0,0 | 0,0 | 0,0 | 0,0 | 0,0 |
| GLYMA01G38390 | ATHB40, HB-5, HB40, homeobox protein 40                                                     | - | 0,0 | 0,0 | 0,0 | 0,0 | 0,0 | 0,0 | 0,0 |
| GLYMA20G25580 | IAA32, MEE10, indole-3-acetic acid inducible 32                                             | - | 0,0 | 0,0 | 0,0 | 0,0 | 0,0 | 0,0 | 0,0 |
| GLYMA13G29190 | ABR, PID, Protein kinase superfamily protein                                                | - | 0,0 | 0,0 | 0,0 | 0,0 | 0,0 | 0,0 | 0,0 |
| GLYMA10G06360 | SAUR-like auxin-responsive protein family                                                   | - | 0,0 | 0,0 | 0,0 | 0,0 | 0,0 | 0,0 | 0,0 |
| GLYMA19G39420 | TIR1, F-box/RNI-like superfamily protein                                                    | - | 0,0 | 0,0 | 0,0 | 0,0 | 0,0 | 0,0 | 0,0 |
| GLYMA06G16870 | SAUR-like auxin-responsive protein family                                                   | - | 0,0 | 0,0 | 0,0 | 0,0 | 0,0 | 0,0 | 0,0 |



|               |                                                                       |   |     |     |     |     |     |     |     |     |
|---------------|-----------------------------------------------------------------------|---|-----|-----|-----|-----|-----|-----|-----|-----|
| GLYMA20G35415 | AGG2, G-protein gamma subunit                                         | - | 0,0 | 0,0 | 0,0 | 0,0 | 0,0 | 0,0 | 0,0 | 0,0 |
| GLYMA19G35180 | IAA13, auxin-induced protein 13                                       | - | 0,0 | 0,0 | 0,0 | 0,0 | 0,0 | 0,0 | 0,0 | 0,0 |
| GLYMA17G01300 | IBR1, SDRA, indole-3-butyric acid response 1                          | - | 0,0 | 0,0 | 0,0 | 0,0 | 0,0 | 0,0 | 0,0 | 0,0 |
| GLYMA18G53900 | SAUR-like auxin-responsive protein family                             | - | 0,0 | 0,0 | 0,0 | 0,0 | 0,0 | 0,0 | 0,0 | 0,0 |
| GLYMA03G01941 | EXGT-A1, EXT, XTH4, xyloglucan                                        | - | 0,0 | 0,0 | 0,0 | 0,0 | 0,0 | 0,0 | 0,0 | 0,0 |
| GLYMA16G07400 | RGLG2, RING domain ligase2                                            | - | 0,0 | 0,0 | 0,0 | 0,0 | 0,0 | 0,0 | 0,0 | 0,0 |
| GLYMA09G30310 | ATMKK7, BUD1, MKK7, MKK7, MAP kinase kinase 7                         | - | 0,0 | 0,0 | 0,0 | 0,0 | 0,0 | 0,0 | 0,0 | 0,0 |
| GLYMA08G43730 | LOP1, TRN1, tornado 1                                                 | - | 0,0 | 0,0 | 0,0 | 0,0 | 0,0 | 0,0 | 0,0 | 0,0 |
| GLYMA13G01150 | TCH4, XTH22, Xyloglucan endotransglucosylase/hydrolase family protein | - | 0,0 | 0,0 | 0,0 | 0,0 | 0,0 | 0,0 | 0,0 | 0,0 |
| GLYMA14G20380 | ATGLB3, GLB3, hemoglobin 3                                            | - | 0,0 | 0,0 | 0,0 | 0,0 | 0,0 | 0,0 | 0,0 | 0,0 |
| GLYMA09G03390 | ATTRB1, TRB1, telomere repeat binding factor 1                        | - | 0,0 | 0,0 | 0,0 | 0,0 | 0,0 | 0,0 | 0,0 | 0,0 |
| GLYMA06G06720 | CHD3, CHR6, GYM, PKL, SSL2, chromatin remodeling factor CHD3 (PICKLE) | - | 0,0 | 0,0 | 0,0 | 0,0 | 0,0 | 0,0 | 0,0 | 0,0 |
| GLYMA09G32810 | Auxin efflux carrier family protein                                   | - | 0,0 | 0,0 | 0,0 | 0,0 | 0,0 | 0,0 | 0,0 | 0,0 |
| GLYMA01G03340 | SAV3, TAA1, WEI8, tryptophan aminotransferase of Arabidopsis          | - | 0,0 | 0,0 | 0,0 | 0,0 | 0,0 | 0,0 | 0,0 | 0,0 |
| GLYMA07G15420 | NDL1, N-MYC downregulated-...                                         | - | 0,0 | 0,0 | 0,0 | 0,0 | 0,0 | 0,0 | 0,0 | 0,0 |
| GLYMA13G25050 | ÄTSEH, SEH, soluble epoxide hydrolase                                 | - | 0,0 | 0,0 | 0,0 | 0,0 | 0,0 | 0,0 | 0,0 | 0,0 |
| GLYMA02G40800 | RVE1, Homeodomain-like superfamily protein                            | - | 0,0 | 0,0 | 0,0 | 0,0 | 0,0 | 0,0 | 0,0 | 0,0 |
| GLYMA08G18470 | anac021, ANAC022, NAC1, NAC domain containing protein 1               | - | 0,0 | 0,0 | 0,0 | 0,0 | 0,0 | 0,0 | 0,0 | 0,0 |
| GLYMA18G05860 | CYP79B2, cytochrome P450, family 79, subfamily B,                     | - | 0,0 | 0,0 | 0,0 | 0,0 | 0,0 | 0,0 | 0,0 | 0,0 |
| GLYMA20G32150 | SAUR-like auxin-responsive protein family                             | - | 0,0 | 0,0 | 0,0 | 0,0 | 0,0 | 0,0 | 0,0 | 0,0 |
| GLYMA19G09975 | ARF8, ATARF8, auxin response factor 8                                 | - | 0,0 | 0,0 | 0,0 | 0,0 | 0,0 | 0,0 | 0,0 | 0,0 |
| GLYMA04G40440 | ILL3, IAA-leucine-resistant (ILR1)-like 3                             | - | 0,0 | 0,0 | 0,0 | 0,0 | 0,0 | 0,0 | 0,0 | 0,0 |
| GLYMA19G30421 | RGLG1, RING domain ligase1                                            | - | 0,0 | 0,0 | 0,0 | 0,0 | 0,0 | 0,0 | 0,0 | 0,0 |
| GLYMA04G05620 | APM1, ATAPM1, aminopeptidase M1                                       | - | 0,0 | 0,0 | 0,0 | 0,0 | 0,0 | 0,0 | 0,0 | 0,0 |

|               |                                                                                                                       |   |     |     |     |     |     |     |     |     |     |
|---------------|-----------------------------------------------------------------------------------------------------------------------|---|-----|-----|-----|-----|-----|-----|-----|-----|-----|
| GLYMA10G03610 | AGG1, ATAGG1, GG1, Ggamma-subunit 1                                                                                   | - | 0,0 | 0,0 | 0,0 | 0,0 | 0,0 | 0,0 | 0,0 | 0,0 | 0,0 |
| GLYMA07G40381 | ARGOS, auxin-regulated gene involved in organ size                                                                    | - | 0,0 | 0,0 | 0,0 | 0,0 | 0,0 | 0,0 | 0,0 | 0,0 | 0,0 |
| GLYMA08G08690 | RPN12a, regulatory particle non-ATPase 12A                                                                            | - | 0,0 | 0,0 | 0,0 | 0,0 | 0,0 | 0,0 | 0,0 | 0,0 | 0,0 |
| GLYMA10G05560 | Homeodomain-like superfamily protein                                                                                  | - | 0,0 | 0,0 | 0,0 | 0,0 | 0,0 | 0,0 | 0,0 | 0,0 | 0,0 |
| GLYMA14G08465 | 5PTASE11, AT5PTASE11, inositol polyphosphate 5-                                                                       | - | 0,0 | 0,0 | 0,0 | 0,0 | 0,0 | 0,0 | 0,0 | 0,0 | 0,0 |
| GLYMA07G00370 | SAUR-like auxin-responsive protein family                                                                             | - | 0,0 | 0,0 | 0,0 | 0,0 | 0,0 | 0,0 | 0,0 | 0,0 | 0,0 |
| GLYMA12G10750 | ATRBX1, HRT1, RBX1, ROC1, RING-box 1                                                                                  | - | 0,0 | 0,0 | 0,0 | 0,0 | 0,0 | 0,0 | 0,0 | 0,0 | 0,0 |
| GLYMA13G09060 | CCA1, circadian clock                                                                                                 | - | 0,0 | 0,0 | 0,0 | 0,0 | 0,0 | 0,0 | 0,0 | 0,0 | 0,0 |
| GLYMA06G20133 | ABCB4, ATPGP4, MDR4, PGP4, ATP binding cassette                                                                       | - | 0,0 | 0,0 | 0,0 | 0,0 | 0,0 | 0,0 | 0,0 | 0,0 | 0,0 |
| GLYMA16G26200 | AFB2, auxin signaling F-box 2                                                                                         | - | 0,0 | 0,0 | 0,0 | 0,0 | 0,0 | 0,0 | 0,0 | 0,0 | 0,0 |
| GLYMA18G03350 | WOX5, WUSCHEL related homeobox 5                                                                                      | - | 0,0 | 0,0 | 0,0 | 0,0 | 0,0 | 0,0 | 0,0 | 0,0 | 0,0 |
| GLYMA06G16640 | SAUR-like auxin-responsive protein family                                                                             | - | 0,0 | 0,0 | 0,0 | 0,0 | 0,0 | 0,0 | 0,0 | 0,0 | 0,0 |
| GLYMA01G35180 | BRX, NLM9, DZC (Disease resistance/zinc finger/chromosome condensation-like region) domain                            | - | 0,0 | 0,0 | 0,0 | 0,0 | 0,0 | 0,0 | 0,0 | 0,0 | 0,0 |
| GLYMA02G01420 | ATWRKY23, WRKY23, WRKY DNA-binding protein 23                                                                         | - | 0,0 | 0,0 | 0,0 | 0,0 | 0,0 | 0,0 | 0,0 | 0,0 | 0,0 |
| GLYMA09G00460 | ABA3, ACI2, ATABA3, LOS5, SIR3, molybdenum cofactor sulfurase (LOS5) (ABA3)                                           | - | 0,0 | 0,0 | 0,0 | 0,0 | 0,0 | 0,0 | 0,0 | 0,0 | 0,0 |
| GLYMA02G45100 | (1 of 36) PF02309//PF02362//PF06507 - AUX/IAA family (AUX_IAA) // B3 DNA binding domain (B3) // Auxin response factor | - | 0,0 | 0,0 | 0,0 | 0,0 | 0,0 | 0,0 | 0,0 | 0,0 | 0,0 |
| GLYMA09G01390 | (1 of 6) PTHR23130:SF80 - AUXIN-INDUCED IN ROOT CULTURES PROTEIN 12                                                   | - | 0,0 | 0,0 | 0,0 | 0,0 | 0,0 | 0,0 | 0,0 | 0,0 | 0,0 |
| GLYMA07G29400 | (1 of 8) PTHR34052:SF1 - AUXIN RESPONSE FACTOR 30-RELATED                                                             | - | 0,0 | 0,0 | 0,0 | 0,0 | 0,0 | 0,0 | 0,0 | 0,0 | 0,0 |
| GLYMA03G39740 | (1 of 2) PTHR10992:SF773 - PROTEIN AUXIN RESPONSE 4                                                                   | - | 0,0 | 0,0 | 0,0 | 0,0 | 0,0 | 0,0 | 0,0 | 0,0 | 0,0 |

GLYMA05G04760 (1 of 16) PF05703 - Auxin - 0,0 0,0 0,0 0,0 0,0 0,0 0,0 0,0  
 canalisation (Auxin\_canalis)

GLYMA16G00220 (1 of 3) PTHR31384:SF28 - - 0,0 0,0 0,0 0,0 0,0 0,0 0,0 0,0  
 AUXIN RESPONSE FACTOR 1

GLYMA07G29410 (1 of 8) PTHR34052:SF1 - - 0,0 0,0 0,0 0,0 0,0 0,0 0,0 0,0  
 AUXIN RESPONSE FACTOR  
 30-RELATED

GLYMA05G27580 (1 of 4) PTHR31384:SF3 - - 0,0 0,0 0,0 0,0 0,0 0,0 0,0 0,0  
 AUXIN RESPONSE FACTOR 6

GLYMA13G20382 (1 of 20) PF02362//PF06507 - - 0,0 0,0 0,0 0,0 0,0 0,0 0,0 0,0  
 B3 DNA binding domain (B3) //  
 Auxin response factor

GLYMA02G15230 (1 of 8) PTHR34052:SF1 - - 0,0 0,0 0,0 0,0 0,0 0,0 0,0 0,0  
 AUXIN RESPONSE FACTOR  
 30-RELATED

GLYMA13G20374 (1 of 5) PTHR31384:SF27 - - 0,0 0,0 0,0 0,0 0,0 0,0 0,0 0,0  
 AUXIN RESPONSE FACTOR  
 10-RELATED

GLYMA06G00895 (1 of 1) PTHR31929:SF2 - - 0,0 0,0 0,0 0,0 0,0 0,0 0,0 0,0  
 AUXIN-RESPONSIVE FAMILY  
 PROTEIN-RELATED

GLYMA0079s003 (1 of 252) PF02519 - Auxin - 0,0 0,0 0,0 0,0 0,0 0,0 0,0 0,0  
 responsive protein  
 (Auxin\_inducible)

GLYMA07G29430 (1 of 8) PTHR34052:SF1 - - 0,0 0,0 0,0 0,0 0,0 0,0 0,0 0,0  
 AUXIN RESPONSE FACTOR  
 30-RELATED

GLYMA0079s002 (1 of 252) PF02519 - Auxin - 0,0 0,0 0,0 0,0 0,0 0,0 0,0 0,0  
 responsive protein

GLYMA12G07560 (1 of 5) PTHR31384:SF20 - - 0,0 0,0 0,0 0,0 0,0 0,0 0,0 0,0  
 AUXIN RESPONSE FACTOR 4

GLYMA07G39630 (1 of 6) PTHR23130:SF80 - - 0,0 0,0 0,0 0,0 0,0 0,0 0,0 0,0  
 AUXIN-INDUCED IN ROOT  
 CULTURES PROTEIN 12

GLYMA11G05510 (1 of 20) K14487 - auxin - 0,0 0,0 0,0 0,0 0,0 0,0 0,0 0,0  
 responsive GH3 gene family

GLYMA05G38540 (1 of 4) PTHR31384:SF8 - - 0,0 0,0 0,0 0,0 0,0 0,0 0,0 0,0  
 AUXIN RESPONSE FACTOR 2

GLYMA02G00260 (1 of 4) PTHR31734:SF11 - - 0,0 0,0 0,0 0,0 0,0 0,0 0,0 0,0  
 AUXIN-RESPONSIVE  
 PROTEIN IAA1-RELATED

GLYMA07G05770 (1 of 252) PF02519 - Auxin - 0,0 0,0 0,0 0,0 0,0 0,0 0,0 0,0  
 responsive protein  
 GLYMA09G14350 (1 of 1) PF03105//PF03321 - - 0,0 0,0 0,0 0,0 0,0 0,0 0,0 0,0  
 SPX domain (SPX) // GH3 auxin-  
 responsive promoter (GH3)  
 GLYMA03G40760 (1 of 4) PTHR31734:SF28 - - 0,0 0,0 0,0 0,0 0,0 0,0 0,0 0,0  
 AUXIN-RESPONSIVE  
 GLYMA16G24110 (1 of 4) PTHR31374:SF35 - - 0,0 0,0 0,0 0,0 0,0 0,0 0,0 0,0  
 AUXIN-INDUCED PROTEIN-  
 GLYMA07G16181 (1 of 5) PTHR31384:SF1 - - 0,0 0,0 0,0 0,0 0,0 0,0 0,0 0,0  
 AUXIN RESPONSE FACTOR  
 12-RELATED  
 GLYMA03G03480 (1 of 5) PTHR31374:SF56 - - 0,0 0,0 0,0 0,0 0,0 0,0 0,0 0,0  
 AUXIN-REGULATED PROTEIN-  
 GLYMA12G14720 (1 of 252) PF02519 - Auxin - 0,0 0,0 0,0 0,0 0,0 0,0 0,0 0,0  
 responsive protein  
 GLYMA13G29320 (1 of 4) PTHR31384:SF3 - - 0,0 0,0 0,0 0,0 0,0 0,0 0,0 0,0  
 AUXIN RESPONSE FACTOR 6  
  
 GLYMA18G40180 (1 of 5) PTHR31384:SF1 - - 0,0 0,0 0,0 0,0 0,0 0,0 0,0 0,0  
 AUXIN RESPONSE FACTOR  
 12-RELATED  
 GLYMA13G01510 (1 of 16) PF05703 - Auxin - 0,0 0,0 0,0 0,0 0,0 0,0 0,0 0,0  
 canalisation (Auxin\_canalis)  
 GLYMA12G32410 (1 of 20) K14487 - auxin - 0,0 0,0 0,0 0,0 0,0 0,0 0,0 0,0  
 responsive GH3 gene family  
 GLYMA13G40310 (1 of 5) PTHR31384:SF20 - - 0,0 0,0 0,0 0,0 0,0 0,0 0,0 0,0  
 AUXIN RESPONSE FACTOR 4  
  
 GLYMA13G38000 (1 of 20) K14487 - auxin - 0,0 0,0 0,0 0,0 0,0 0,0 0,0 0,0  
 responsive GH3 gene family  
 GLYMA13G17380 (1 of 6) PTHR31374:SF22 - - 0,0 0,0 0,0 0,0 0,0 0,0 0,0 0,0  
 AUXIN-RESPONSIVE  
 PROTEIN-LIKE PROTEIN-  
 RELATED  
 GLYMA01G41640 (1 of 16) PF05703 - Auxin - 0,0 0,0 0,0 0,0 0,0 0,0 0,0 0,0  
 canalisation (Auxin\_canalis)  
 GLYMA06G17581 (1 of 252) PF02519 - Auxin - 0,0 0,0 0,0 0,0 0,0 0,0 0,0 0,0  
 responsive protein  
 (Auxin\_inducible)  
 GLYMA10G41640 (1 of 2) PTHR31734:SF29 - - 0,0 0,0 0,0 0,0 0,0 0,0 0,0 0,0  
 AUXIN-RESPONSIVE  
 PROTEIN IAA32-RELATED  
 GLYMA11G20050 (1 of 6) PTHR31374:SF16 - - 0,0 0,0 0,0 0,0 0,0 0,0 0,0 0,0  
 AUXIN-RESPONSIVE FAMILY

GLYMA07G06060 (1 of 3) PTHR31384:SF17 - - 0,0 0,0 0,0 0,0 0,0 0,0 0,0 0,0  
 AUXIN RESPONSE FACTOR  
 11-RELATED

GLYMA06G04000 (1 of 8) PTHR34052:SF1 - - 0,0 0,0 0,0 0,0 0,0 0,0 0,0 0,0  
 AUXIN RESPONSE FACTOR  
 30-RELATED

GLYMA03G36710 (1 of 36) - 0,0 0,0 0,0 0,0 0,0 0,0 0,0 0,0  
 PF02309//PF02362//PF06507 -  
 AUX/IAA family (AUX\_IAA) // B3  
 DNA binding domain (B3) //  
 Auxin response factor

GLYMA03G22260 (1 of 3) PTHR23130:SF95 - - 0,0 0,0 0,0 0,0 0,0 0,0 0,0 0,0  
 AUXIN-RESPONSIVE

GLYMA17G14686 (1 of 5) PTHR31374:SF56 - - 0,0 0,0 0,0 0,0 0,0 0,0 0,0 0,0  
 AUXIN-REGULATED PROTEIN-

GLYMA14G36390 (1 of 4) PTHR31734:SF18 - - 0,0 0,0 0,0 0,0 0,0 0,0 0,0 0,0  
 AUXIN-RESPONSIVE

GLYMA12G14800 (1 of 252) PF02519 - Auxin - 0,0 0,0 0,0 0,0 0,0 0,0 0,0 0,0  
 responsive protein

GLYMA17G04760 (1 of 2) PTHR31734:SF3 - - 0,0 0,0 0,0 0,0 0,0 0,0 0,0 0,0  
 AUXIN-RESPONSIVE

GLYMA11G15910 (1 of 5) PTHR31384:SF20 - - 0,0 0,0 0,0 0,0 0,0 0,0 0,0 0,0  
 AUXIN RESPONSE FACTOR 4

GLYMA08G25650 (1 of 252) PF02519 - Auxin - 0,0 0,0 0,0 0,0 0,0 0,0 0,0 0,0  
 responsive protein

GLYMA12G28550 (1 of 3) PTHR31384:SF28 - - 0,0 0,0 0,0 0,0 0,0 0,0 0,0 0,0  
 AUXIN RESPONSE FACTOR 1

GLYMA13G37550 (1 of 4) PTHR31901:SF10 - - 0,0 0,0 0,0 0,0 0,0 0,0 0,0 0,0  
 AUXIN-RESPONSIVE GH3  
 FAMILY PROTEIN

GLYMA15G08540 (1 of 4) PTHR31384:SF5 - - 0,0 0,0 0,0 0,0 0,0 0,0 0,0 0,0  
 AUXIN RESPONSE FACTOR 3

GLYMA12G11200 (1 of 20) K14487 - auxin - 0,0 0,0 0,0 0,0 0,0 0,0 0,0 0,0  
 responsive GH3 gene family

GLYMA02G16330 (1 of 16) PF05703 - Auxin - 0,0 0,0 0,0 0,0 0,0 0,0 0,0 0,0  
 canalisation (Auxin\_canalis)

GLYMA08G42045 (1 of 252) PF02519 - Auxin - 0,0 0,0 0,0 0,0 0,0 0,0 0,0 0,0  
 responsive protein

GLYMA10G03500 (1 of 16) PF05703 - Auxin - 0,0 0,0 0,0 0,0 0,0 0,0 0,0 0,0  
 canalisation (Auxin\_canalis)

GLYMA19G36781 (1 of 6) PTHR31374:SF16 - - 0,0 0,0 0,0 0,0 0,0 0,0 0,0 0,0  
 AUXIN-RESPONSIVE FAMILY

GLYMA13G02410 (1 of 3) PTHR31384:SF19 - - 0,0 0,0 0,0 0,0 0,0 0,0 0,0 0,0  
 AUXIN RESPONSE FACTOR  
 17

GLYMA04G03900 (1 of 8) PTHR34052:SF1 - - 0,0 0,0 0,0 0,0 0,0 0,0 0,0 0,0  
 AUXIN RESPONSE FACTOR  
 30-RELATED

GLYMA17G07630 (1 of 16) PF05703 - Auxin - 0,0 0,0 0,0 0,0 0,0 0,0 0,0 0,0  
 canalisation (Auxin\_canalis)

GLYMA03G32451 (1 of 4) PTHR31734:SF6 - - 0,0 0,0 0,0 0,0 0,0 0,0 0,0 0,0  
 AUXIN-RESPONSIVE  
 PROTEIN IAA10-RELATED

GLYMA02G01010 (1 of 4) PTHR31734:SF15 - - 0,0 0,0 0,0 0,0 0,0 0,0 0,0 0,0  
 AUXIN-RESPONSIVE  
 PROTEIN IAA20-RELATED

GLYMA07G32300 (1 of 4) PTHR31384:SF5 - - 0,0 0,0 0,0 0,0 0,0 0,0 0,0 0,0  
 AUXIN RESPONSE FACTOR 3

GLYMA15G12240 (1 of 6) PTHR23130:SF80 - - 0,0 0,0 0,0 0,0 0,0 0,0 0,0 0,0  
 AUXIN-INDUCED IN ROOT  
 CULTURES PROTEIN 12

GLYMA17G18080 (1 of 20) K14487 - auxin - 0,0 0,0 0,0 0,0 0,0 0,0 0,0 0,0  
 responsive GH3 gene family  
 (GH3)

GLYMA17G18040 (1 of 20) K14487 - auxin - 0,0 0,0 0,0 0,0 0,0 0,0 0,0 0,0  
 responsive GH3 gene family

GLYMA09G32570 (1 of 53) K14484 - auxin- - 0,0 0,0 0,0 0,0 0,0 0,0 0,0 0,0  
 responsive protein IAA (IAA)

GLYMA12G32910 (1 of 4) PTHR31901:SF10 - - 0,0 0,0 0,0 0,0 0,0 0,0 0,0 0,0  
 AUXIN-RESPONSIVE GH3  
 FAMILY PROTEIN

GLYMA09G08480 (1 of 6) PTHR31374:SF22 - - 0,0 0,0 0,0 0,0 0,0 0,0 0,0 0,0  
 AUXIN-RESPONSIVE  
 PROTEIN-LIKE PROTEIN-  
 RELATED

GLYMA10G06427 (1 of 252) PF02519 - Auxin - 0,0 0,0 0,0 0,0 0,0 0,0 0,0 0,0  
 responsive protein

GLYMA15G02040 (1 of 4) PTHR31734:SF5 - - 0,0 0,0 0,0 0,0 0,0 0,0 0,0 0,0  
 AUXIN-RESPONSIVE

GLYMA12G14560 (1 of 252) PF02519 - Auxin - 0,0 0,0 0,0 0,0 0,0 0,0 0,0 0,0  
 responsive protein

GLYMA09G35470 (1 of 252) PF02519 - Auxin - 0,0 0,0 0,0 0,0 0,0 0,0 0,0 0,0  
 responsive protein

GLYMA04G00840 (1 of 252) PF02519 - Auxin responsive protein - 0,0 0,0 0,0 0,0 0,0 0,0 0,0 0,0  
 GLYMA17G01170 (1 of 6) PTHR23130:SF80 - AUXIN-INDUCED IN ROOT CULTURES PROTEIN 12 - 0,0 0,0 0,0 0,0 0,0 0,0 0,0 0,0  
 GLYMA14G33730 (1 of 3) PTHR31384:SF19 - AUXIN RESPONSE FACTOR 17 - 0,0 0,0 0,0 0,0 0,0 0,0 0,0 0,0  
 GLYMA12G14580 (1 of 252) PF02519 - Auxin responsive protein (Auxin\_inducible) - 0,0 0,0 0,0 0,0 0,0 0,0 0,0 0,0  
 GLYMA19G34180 (1 of 16) PF05703 - Auxin canalisation (Auxin\_canalis) - 0,0 0,0 0,0 0,0 0,0 0,0 0,0 0,0  
 GLYMA19G39340 (1 of 17) K14486 - auxin response factor (K14486, ARF) - 0,0 0,0 0,0 0,0 0,0 0,0 0,0 0,0  
 GLYMA01G36030 (1 of 5) PTHR31651:SF5 - AUXIN EFFLUX CARRIER FAMILY PROTEIN-RELATED - 0,0 0,0 0,0 0,0 0,0 0,0 0,0 0,0  
 GLYMA13G43310 (1 of 4) PTHR31734:SF5 - AUXIN-RESPONSIVE - 0,0 0,0 0,0 0,0 0,0 0,0 0,0 0,0  
 GLYMA20G01290 (1 of 8) PTHR34052:SF1 - AUXIN RESPONSE FACTOR 30-RELATED - 0,0 0,0 0,0 0,0 0,0 0,0 0,0 0,0  
 GLYMA09G35320 (1 of 252) PF02519 - Auxin responsive protein - 0,0 0,0 0,0 0,0 0,0 0,0 0,0 0,0  
 GLYMA16G01390 (1 of 2) PTHR33565:SF3 - DORMANCY/AUXIN ASSOCIATED FAMILY - 0,0 0,0 0,0 0,0 0,0 0,0 0,0 0,0  
 GLYMA14G03650 (1 of 36) PF02309//PF02362//PF06507 - AUX/IAA family (AUX\_IAA) // B3 DNA binding domain (B3) // Auxin response factor - 0,0 0,0 0,0 0,0 0,0 0,0 0,0 0,0  
 GLYMA04G37760 (1 of 4) PTHR31384:SF8 - AUXIN RESPONSE FACTOR 2 - 0,0 0,0 0,0 0,0 0,0 0,0 0,0 0,0  
 GLYMA09G35410 (1 of 252) PF02519 - Auxin responsive protein - 0,0 0,0 0,0 0,0 0,0 0,0 0,0 0,0  
 GLYMA0101s002 (1 of 252) PF02519 - Auxin responsive protein (Auxin\_inducible) - 0,0 0,0 0,0 0,0 0,0 0,0 0,0 0,0  
 GLYMA11G31940 (1 of 6) PTHR31384:SF2 - AUXIN RESPONSE FACTOR 8 - 0,0 0,0 0,0 0,0 0,0 0,0 0,0 0,0

GLYMA16G02650 (1 of 3) PTHR31384:SF17 - - 0,0 0,0 0,0 0,0 0,0 0,0 0,0 0,0  
 AUXIN RESPONSE FACTOR  
 11-RELATED

GLYMA12G15040 (1 of 252) PF02519 - Auxin - 0,0 0,0 0,0 0,0 0,0 0,0 0,0 0,0  
 responsive protein  
 (Auxin\_inducible)

GLYMA16G02350 (1 of 252) PF02519 - Auxin - 0,0 0,0 0,0 0,0 0,0 0,0 0,0 0,0  
 responsive protein

GLYMA13G39800 (1 of 6) PTHR31374:SF16 - - 0,0 0,0 0,0 0,0 0,0 0,0 0,0 0,0  
 AUXIN-RESPONSIVE FAMILY

GLYMA12G15030 (1 of 252) PF02519 - Auxin - 0,0 0,0 0,0 0,0 0,0 0,0 0,0 0,0  
 responsive protein

GLYMA15G19980 (1 of 4) PTHR31384:SF21 - - 0,0 0,0 0,0 0,0 0,0 0,0 0,0 0,0  
 AUXIN RESPONSE FACTOR  
 19-RELATED

GLYMA19G40970 (1 of 4) PTHR31734:SF15 - - 0,0 0,0 0,0 0,0 0,0 0,0 0,0 0,0  
 AUXIN-RESPONSIVE  
 PROTEIN IAA20-RELATED

GLYMA08G04070 (1 of 53) K14484 - auxin- - 0,0 0,0 0,0 0,0 0,0 0,0 0,0 0,0  
 responsive protein IAA (IAA)

GLYMA14G38940 (1 of 6) PTHR31384:SF2 - - 0,0 0,0 0,0 0,0 0,0 0,0 0,0 0,0  
 AUXIN RESPONSE FACTOR 8

GLYMA17G37580 (1 of 3) PTHR31384:SF10 - - 0,0 0,0 0,0 0,0 0,0 0,0 0,0 0,0  
 AUXIN RESPONSE FACTOR 5

GLYMA12G16874 (1 of 252) PF02519 - Auxin - 0,0 0,0 0,0 0,0 0,0 0,0 0,0 0,0  
 responsive protein

GLYMA12G14960 (1 of 252) PF02519 - Auxin - 0,0 0,0 0,0 0,0 0,0 0,0 0,0 0,0  
 responsive protein

GLYMA11G03720 (1 of 16) PF05703 - Auxin - 0,0 0,0 0,0 0,0 0,0 0,0 0,0 0,0  
 canalisation (Auxin\_canalis)

GLYMA03G01700 (1 of 252) PF02519 - Auxin - 0,0 0,0 0,0 0,0 0,0 0,0 0,0 0,0  
 responsive protein

GLYMA18G15110 (1 of 6) PTHR31384:SF2 - - 0,0 0,0 0,0 0,0 0,0 0,0 0,0 0,0  
 AUXIN RESPONSE FACTOR 8

GLYMA08G45940 (1 of 3) PTHR23130:SF95 - - 0,0 0,0 0,0 0,0 0,0 0,0 0,0 0,0  
 AUXIN-RESPONSIVE

GLYMA07G04810 (1 of 2) PTHR33565:SF3 - - 0,0 0,0 0,0 0,0 0,0 0,0 0,0 0,0  
 DORMANCY/AUXIN  
 ASSOCIATED FAMILY

GLYMA05G35640 (1 of 53) K14484 - auxin- - 0,0 0,0 0,0 0,0 0,0 0,0 0,0 0,0  
 responsive protein IAA (IAA)



GLYMA12G14940 (1 of 252) PF02519 - Auxin - 0,0 0,0 0,0 0,0 0,0 0,0 0,0 0,0  
 responsive protein

GLYMA12G24368 (1 of 3) PTHR31384:SF10 - - 0,0 0,0 0,0 0,0 0,0 0,0 0,0 0,0  
 AUXIN RESPONSE FACTOR 5

GLYMA12G08420 (1 of 6) PTHR31374:SF16 - - 0,0 0,0 0,0 0,0 0,0 0,0 0,0 0,0  
 AUXIN-RESPONSIVE FAMILY

GLYMA07G33210 (1 of 8) PTHR34052:SF1 - - 0,0 0,0 0,0 0,0 0,0 0,0 0,0 0,0  
 AUXIN RESPONSE FACTOR  
 30-RELATED

GLYMA19G21600 (1 of 2) PTHR31419:SF2 - - 0,0 0,0 0,0 0,0 0,0 0,0 0,0 0,0  
 AUXIN EFFLUX CARRIER  
 FAMILY PROTEIN

GLYMA10G35360 (1 of 2) PTHR31374:SF45 - - 0,0 0,0 0,0 0,0 0,0 0,0 0,0 0,0  
 AUXIN-RESPONSIVE FAMILY

GLYMA18G05330 (1 of 6) PTHR31384:SF2 - - 0,0 0,0 0,0 0,0 0,0 0,0 0,0 0,0  
 AUXIN RESPONSE FACTOR 8

GLYMA10G35481 (1 of 20) PF02362//PF06507 - - 0,0 0,0 0,0 0,0 0,0 0,0 0,0 0,0  
 B3 DNA binding domain (B3) //  
 Auxin response factor  
 (Auxin\_resp)

**Table S2.** Average rate of hypocotyl growth (mm / h) in Arabidopsis seedlings of the indicated genotype as affected by different combinations of previous shade (PS) and current shade (CS).

The rates are highlighted in red and blue when higher or lower than the rate of the Col wild type respectively.

L= loss-of-function mutant. G= gain-of-function mutant

The significance compared to the Col wild type is indicated (NS= not significant)

| PS                    |    | 0     | 0     | 0     | 0.07  | 0.07  | 0.07  | 0.09  | 0.09  | 0.09  |         |
|-----------------------|----|-------|-------|-------|-------|-------|-------|-------|-------|-------|---------|
| CS                    |    | 0     | 0.07  | 0.09  | 0     | 0.07  | 0.09  | 0     | 0.07  | 0.09  |         |
| Col                   | -- | 0.052 | 0.072 | 0.076 | 0.060 | 0.088 | 0.095 | 0.066 | 0.102 | 0.119 |         |
| <i>phyB</i>           | L  | 0.077 | 0.111 | 0.123 | 0.073 | 0.083 | 0.113 | 0.070 | 0.100 | 0.101 | <0.0001 |
| <i>pif3</i>           | L  | 0.033 | 0.042 | 0.051 | 0.053 | 0.086 | 0.100 | 0.066 | 0.102 | 0.114 | <0.0001 |
| <i>pif4</i>           | L  | 0.033 | 0.038 | 0.049 | 0.050 | 0.078 | 0.074 | 0.056 | 0.079 | 0.108 | <0.0001 |
| <i>pif5</i>           | L  | 0.040 | 0.048 | 0.055 | 0.057 | 0.073 | 0.087 | 0.061 | 0.086 | 0.097 | <0.0001 |
| <i>pif7-1</i>         | L  | 0.013 | 0.021 | 0.019 | 0.032 | 0.058 | 0.062 | 0.029 | 0.031 | 0.054 | <0.0001 |
| <i>pif7-2</i>         | L  | 0.013 | 0.020 | 0.021 | 0.026 | 0.049 | 0.058 | 0.024 | 0.043 | 0.043 | <0.0001 |
| <i>pif3 pif4</i>      | L  | 0.033 | 0.037 | 0.047 | 0.041 | 0.063 | 0.061 | 0.052 | 0.069 | 0.096 | <0.0001 |
| <i>pif4 pif5</i>      | L  | 0.029 | 0.034 | 0.048 | 0.040 | 0.061 | 0.063 | 0.053 | 0.068 | 0.083 | <0.0001 |
| <i>pif3 pif4 pif5</i> | L  | 0.033 | 0.046 | 0.053 | 0.052 | 0.051 | 0.058 | 0.055 | 0.065 | 0.101 | <0.0001 |
| <i>iaa19 (msg2)</i>   | G  | 0.090 | 0.129 | 0.140 | 0.111 | 0.159 | 0.147 | 0.086 | 0.144 | 0.157 | <0.0001 |
| <i>iaa29</i>          | L  | 0.027 | 0.046 | 0.038 | 0.030 | 0.078 | 0.085 | 0.044 | 0.091 | 0.074 | <0.0001 |
| <i>iaa17 (axr3)</i>   | G  | 0.026 | 0.015 | 0.012 | 0.017 | 0.016 | 0.015 | 0.015 | 0.010 | 0.012 | <0.0001 |
| <i>iaa7 (axr2)</i>    | G  | 0.062 | 0.094 | 0.103 | 0.082 | 0.116 | 0.123 | 0.081 | 0.103 | 0.160 | <0.0001 |
| <i>iaa14 (slr)</i>    | G  | 0.035 | 0.048 | 0.078 | 0.057 | 0.123 | 0.125 | 0.064 | 0.092 | 0.145 | NS      |
| <i>iaa30</i>          | L  | 0.042 | 0.056 | 0.057 | 0.062 | 0.098 | 0.127 | 0.075 | 0.113 | 0.156 | NS      |
| <i>MIR393a</i>        | L  | 0.057 | 0.072 | 0.062 | 0.064 | 0.103 | 0.095 | 0.078 | 0.144 | 0.174 | 0.0001  |
| <i>MIR393b</i>        | L  | 0.054 | 0.097 | 0.072 | 0.070 | 0.081 | 0.105 | 0.091 | 0.153 | 0.185 | <0.0001 |
| <i>MIR393ab</i>       | L  | 0.058 | 0.093 | 0.077 | 0.091 | 0.106 | 0.181 | 0.075 | 0.178 | 0.154 | <0.0001 |
| <i>tir1afb2</i>       | L  | 0.045 | 0.061 | 0.055 | 0.055 | 0.058 | 0.060 | 0.056 | 0.098 | 0.078 | <0.0001 |
| <i>arf6</i>           | L  | 0.077 | 0.138 | 0.121 | 0.076 | 0.131 | 0.177 | 0.086 | 0.170 | 0.161 | <0.0001 |
| <i>arf7</i>           | L  | 0.045 | 0.095 | 0.101 | 0.052 | 0.091 | 0.096 | 0.052 | 0.103 | 0.099 | NS      |
| <i>arf6 arf7</i>      | L  | 0.057 | 0.112 | 0.120 | 0.057 | 0.114 | 0.131 | 0.070 | 0.105 | 0.109 | <0.0001 |
| <i>arf6 arf8</i>      | L  | 0.089 | 0.123 | 0.129 | 0.092 | 0.099 | 0.158 | 0.099 | 0.158 | 0.179 | <0.0001 |

**Table S3.** Mutant and transgenic lines used in this study. All the lines are in the Columbia background except for *35S:PHYB-YFP*, which is in Landsberg *erecta*.

### Mutants

*phyB-9* (28)  
*pif3-3* (this allele is listed as *pif3-7* in single and multiple mutants in ABRC) (29)  
*pif4-101* (30)  
*pif5-3 (pil6-1)* (31)  
*pif3-3 pif4-2* (32)  
*pif4-101 pif5-3* (30)  
*pif3-3 pif4-1 pif5* (32)  
*pif7-1*, (33)  
*pif7-2* , (33)  
*sav3-1* (34)  
*iaa29* (35)  
*iaa30* (36)  
*iaa19 (msg2-1)* (37)  
*iaa7 (axr2-1)* (38)  
*iaa14 (slr1-1)* (39)  
*iaa17 (axr3-1)* (40)  
*mir393a-1* (41)  
*mir393b-1* (42)  
*mir393a-1 mir393b-1* (41)  
*tir1-1 afb2-3* (43)  
*arf6-1* (44)  
*arf7-1* (45)  
*nph4-1 arf6-2* Kindly provided by Jason Reed (Biology Department | UNC Chapel Hill)  
*arf6-1 arf8-2* (44)

### Transgenic lines

*pIAA19:GUS* (37)  
*p35S:PHYB-YFP* (27)  
*pPIF4:GUS*, (35)  
*pPIF4:PIF4-GFP*, this paper  
*pPIF4:PIF4-HA* in *pif4 pif5* (46)  
*pSUC2:PIF4* (47)  
*pTIR1:TIR1-GUS* (48)  
*pAFB2:AFB2-GUS* (48)  
*pAFB2:AFB2m-GUS* (48)  
*pMIR393A:GUS* (48)  
*pMIR393B:GUS* (48)  
*pDR5:GUS mir393ab* (41)  
*pDEX:TIR1-myc* (49)  
DII-VENUS (50)  
*pARF6:ARF6-GFP* (51)  
*pARF6-n3GFP* (51)  
*p35S:YFP-ELF3* (52)  
*p35S:GFP-HFR1* (53)

**Table S4.** Primers used for real-time PCR. Fw: Forward, Rv: reverse.

*PHYB*

Fw TGGAAATGAAGATGATGGGAGCAATG

Rv GCAGCGAGAAGAAGTGTGATGG

*PIF4*

Fw ACTTCTCCTCCCACTTCTTCTCAAC

Rv TGGACTTAGGCTTAACCGTCTCTG

*IAA19*

Fw GGCAGAGAAGATGATGAAGAAGAG

Rv TCAGCGTCACCACCAGATG

*IAA29*

Fw CGAGGGTGCTGCGTCTTGTTTG

Rv CACGATGATGATACGGGCAATGATGG

*UBC*

Fw AGAATGCTTGGAGTCCTGCTTG

Rv ACATTTGTGCCATTGAATTGAACCC

**Table S5.** Primers used for transient activation assays. Fw: Forward, Rv: reverse.

*pIAA17*

Fw GGGGACAAGTTTGTACAAAAAAGCAGGCTGAGTTGTGGCCTTGTATTGTC  
Rv GGGGACCACTTTGTACAAGAAAGCTGGGTCTGACACTGCCCATCATtattaac

*eIAA19*

Fw CACCATGGAGAAGGAAGGACTCGGG  
Rv CTCGTCTACTCCTCTAGGCTGC

*ePIF4*

Fw CACCATGGAACACCAAGGTTGG  
Rv TCCGTGGTCCAACGAGAACCGTC
